Rem et al.

Running title: Amyloid- $\beta$  is not a functional GABA<sub>B</sub> ligand

1 **Soluble amyloid- $\beta$  precursor peptide does not regulate GABA<sub>B</sub>**  
2 **receptor activity**

3

4 Pascal Dominic Rem<sup>1</sup>, Vita Sereikaite<sup>2</sup>, Diego Fernandez-Fernandez<sup>1</sup>, Sebastian Reinartz<sup>1</sup>,  
5 Daniel Ulrich<sup>1</sup>, Thorsten Fritzius<sup>1</sup>, Luca Trovò<sup>1</sup>, Salome Roux<sup>3</sup>, Ziyang Chen<sup>2</sup>, Philippe  
6 Rondard<sup>3</sup>, Jean-Philippe Pin<sup>3</sup>, Jochen Schwenk<sup>4,5,6</sup>, Bernd Fakler<sup>4,5,6</sup>, Martin Gassmann<sup>1</sup>,  
7 Tania R. Barkat<sup>1</sup>, Kristian Strømgaard<sup>2</sup>, Bernhard Bettler<sup>1</sup>.

8

9 <sup>1</sup>Department of Biomedicine, Pharmazentrum, University of Basel, Klingelbergstrasse 50/70,  
10 CH-4056 Basel, Switzerland.

11 <sup>2</sup>Center for Biopharmaceuticals, Department of Drug Design and Pharmacology, University of  
12 Copenhagen, Universitetsparken 2, 2100 Copenhagen, Denmark.

13 <sup>3</sup>Institut de Génomique Fonctionnelle, Université de Montpellier, CNRS, INSERM, 34094  
14 Montpellier Cedex 05, France

15 <sup>4</sup>BrainLinks-BrainTools Cluster of Excellence, University Freiburg, Germany

16 <sup>5</sup>Institute of Physiology II, University of Freiburg, Hermann-Herderstrasse 7, 79104 Freiburg,  
17 Germany.

18 <sup>6</sup>CIBSS Center for Integrative Biological Signaling Studies, University of Freiburg,  
19 Albertstrasse 10, 79108 Freiburg, Germany.

20

21 \*Correspondence should be addressed to B.B. (email: [bernhard.bettler@unibas.ch](mailto:bernhard.bettler@unibas.ch))

Rem et al. Running title: Amyloid- $\beta$  is not a functional GABA<sub>B</sub> ligand

## 22 **Abstract**

23 **Amyloid- $\beta$  precursor protein (APP) regulates neuronal activity through the release of**  
24 **secreted APP (sAPP) acting at cell-surface receptors. APP and sAPP were reported to**  
25 **bind to the extracellular sushi domain 1 (SD1) of GABA<sub>B</sub> receptors (GBRs). A 17**  
26 **amino-acid peptide (APP17) derived from APP was sufficient for SD1 binding and**  
27 **shown to mimic the inhibitory effect of sAPP on neurotransmitter release and**  
28 **neuronal activity. The functional effects of APP17 and sAPP were similar to those of**  
29 **the GBR agonist baclofen and blocked by a GBR antagonist. These experiments led**  
30 **to the proposal that sAPP activates GBRs to exert its neuronal effects. However,**  
31 **whether APP17 and sAPP indeed influence classical GBR signaling pathways in**  
32 **heterologous cells was not analyzed. Here, we confirm that APP17 binds to GBRs with**  
33 **nanomolar affinity. However, biochemical and electrophysiological assays indicate**  
34 **that APP17 does not influence GBR activity in heterologous cells. Moreover, we found**  
35 **no evidence for APP17 regulating K<sup>+</sup> currents in cultured neurons, neurotransmitter**  
36 **release in brain slices, or neuronal activity *in vivo*. Our results show that APP17 is not**  
37 **a functional GBR ligand and indicate that sAPP exerts neuronal effects through**  
38 **receptors other than GBRs.**

39

## 40 **Introduction**

41 Amyloid precursor protein (APP or A4 protein) is a transmembrane protein that undergoes  
42 proteolytic processing by secretases. The amyloidogenic pathway generates amyloid- $\beta$   
43 peptides (A $\beta$ ) that are key etiological agents of Alzheimer's disease (AD). The competing  
44 non-amyloidogenic pathway generates secreted APP (sAPP) variants that modulate spine  
45 density, synaptic transmission, plasticity processes, and rescue synaptic deficits in *APP*<sup>-/-</sup>  
46 mice (Muller et al., 2017; Haass and Willem, 2019; Tang, 2019). It is assumed that cell  
47 surface receptors mediate the synaptic effects of sAPP (Richter et al., 2018; Haass and  
48 Willem, 2019; Tang, 2019; Barthet and Mulle, 2020). It was recently proposed that sAPP acts  
49 at G protein-coupled GABA<sub>B</sub> receptors (GBRs) to modulate synaptic transmission and

Rem et al. Running title: Amyloid- $\beta$  is not a functional GABA<sub>B</sub> ligand

50 neuronal activity (Rice et al., 2019)(reviewed by (Haass and Willem, 2019; Korte, 2019;  
51 Tang, 2019; Yates, 2019; Barthet and Mulle, 2020)). GBRs are attractive candidates for  
52 mediating the functional effects of sAPP because they regulate neurotransmitter release,  
53 neuronal inhibition, and synaptic plasticity processes by reducing cAMP levels and gating  
54 Ca<sup>2+</sup> and K<sup>+</sup> channels (Luscher and Slesinger, 2010; Gassmann and Bettler, 2012; Pin and  
55 Bettler, 2016; Barthet and Mulle, 2020).

56 GBRs are composed of GB1a or GB1b subunits with a GB2 subunit, which  
57 generates GB1a/2 and GB1b/2 receptors (Pin and Bettler, 2016). GB1a differs from GB1b by  
58 the presence of two N-terminal sushi domains (SD1/2). GB1a/2 and GB1b/2 receptors  
59 predominantly localize to pre- and postsynaptic sites, respectively (Vigot et al., 2006). APP  
60 and sAPP bind to SD1 of GB1a (Schwenk et al., 2016; Dinamarca et al., 2019; Rice et al.,  
61 2019). Synthetic APP peptides of 9 or 17 amino acid residues, termed APP9 and APP17, are  
62 sufficient for binding and inducing a stable conformation in SD1 (Rice et al., 2019; Feng et  
63 al., 2021; Yang et al., 2022). APP, sAPP and APP17 bound to recombinant SD1 with a  $K_D$  of  
64 183, 431 and 810 nM, respectively (Dinamarca et al., 2019; Rice et al., 2019). Consistent  
65 with an action on presynaptic GB1a/2 receptors, sAPP and APP17 reduced the frequency of  
66 miniature excitatory postsynaptic currents (mEPSCs) in brain slices, similar to the orthosteric  
67 GBR agonist baclofen (Rice et al., 2019). The antagonist CGP55845 reduced the inhibitory  
68 effect of APP17 on the mEPSC frequency, further supporting that APP17 activates GBRs  
69 (Rice et al., 2019). Moreover, APP17 inhibited neuronal activity in the hippocampus of  
70 anesthetized mice (Rice et al., 2019), consistent with a GBR-mediated inhibition of glutamate  
71 release and/or activation of postsynaptic K<sup>+</sup> currents. Based on these experiments, Rice and  
72 colleagues proposed that APP17 and sAPP are functional GBR ligands. However, no  
73 evidence was presented that sAPP or APP17 regulates classical GBR-activated G protein  
74 signaling pathways, which is necessary to establish a direct action at GBRs. In separate  
75 studies, the binding of APP to GB1a/2 receptors *in cis* was shown to mediate receptor  
76 transport to presynaptic sites and to stabilize receptors at the cell surface (Hannan et al.,  
77 2012; Dinamarca et al., 2019). Accordingly, *APP*<sup>-/-</sup> mice exhibited a 75% decrease of axonal

Rem et al. Running title: Amyloid- $\beta$  is not a functional GABA<sub>B</sub> ligand

78 GBRs in hippocampal neurons, which significantly reduced GBR-mediated presynaptic  
79 inhibition (Dinamarca et al., 2019), as already observed earlier (Seabrook et al., 1999).  
80 However, sAPP had no effect on GBR-mediated G protein activation in transfected HEK293  
81 cells (Dinamarca et al., 2019). Thus, it remains controversial whether sAPP and APP17 are  
82 functional ligands at GBRs or not.

83 The reported effects of APP17 on synaptic release and neuronal activity (Rice et al.,  
84 2019) suggest that APP17 acts as a positive allosteric modulator (PAM) or ago-PAM (PAM  
85 with agonistic properties) at GBRs. However, in principle, APP17 could also increase  
86 constitutive activity of GBRs (Grunewald et al., 2002; Rajalu et al., 2015) by binding to SD1  
87 and/or displacing APP from SD1. To clarify whether APP17 influences GBR activity, we  
88 studied the effects of APP17 on classical GBR signaling pathways in transfected HEK293T  
89 cells, cultured neurons, acute hippocampal slices and in anesthetized mice. Our experiments  
90 confirm that APP17 binds with nanomolar affinity to purified recombinant SD1/2 protein and  
91 to GB1a/2 receptors expressed in HEK293T cells. However, in our hands, APP17 neither  
92 induced conformational changes consistent with GBR activation nor influenced GBR-  
93 mediated G protein activity, cAMP inhibition or Kir3-type K<sup>+</sup> currents. APP17 also failed to  
94 modulate constitutive GBR activity in the absence or presence of APP expressed *in cis* or *in*  
95 *trans*. Moreover, APP17 neither influenced K<sup>+</sup> currents in cultured hippocampal neurons, nor  
96 reduced the amplitude of evoked EPSCs in acute hippocampal slices or modulated neuronal  
97 activity in living mice. Thus, our *in vitro* and *in vivo* data indicate that receptors other than  
98 GBRs mediate the synaptic effects of sAPP.

99

## 100 **Results**

### 101 **APP17 binds to purified recombinant SD1/2 protein and GB1a/2 receptors expressed** 102 **in HEK293T cells**

103 We purchased APP17 and scrambled sc-APP17 peptides from the same commercial  
104 provider as Rice and colleagues (Rice et al., 2019) (Figure 1A). For displacement  
105 experiments, we additionally synthesized fluorescent APP17-TMR and sc-APP17-TMR

Rem et al. Running title: Amyloid- $\beta$  is not a functional GABA<sub>B</sub> ligand

106 peptides labeled with TAMRA (5(6)-carboxytetramethylrhodamine, Figure 1A). ESI-LC-MS  
107 and RP-UPLC analysis revealed that all peptides had the expected molecular weight and  
108 purity (Figure 1A). Isothermal titration calorimetry (ITC) showed that APP17 interacts with  
109 purified recombinant SD1/2 protein (Schwenk et al., 2016) in solution with a ~1:1  
110 stoichiometry and a  $K_D$  of 543 nM (Figure 1B). This agrees well with the published  $K_D$  of 810  
111 nM for binding of APP17 to SD1 (Rice et al., 2019). In contrast, sc-APP17 showed no  
112 detectable binding ( $K_D > 300 \mu\text{M}$ ). APP17-TMR exhibited significantly more binding to  
113 HEK293T cells expressing GB1a/2 receptors than sc-APP17-TMR (Figure 1C). Accordingly,  
114 10  $\mu\text{M}$  APP17 but not sc-APP17 displaced 1  $\mu\text{M}$  APP17-TMR from GB1a/2 receptors (Figure  
115 1C). In all subsequent experiments, we used the commercial APP17 peptide validated for  
116 binding to recombinant SD1/2 protein and GB1a/2 receptors expressed in HEK293T cells.

117

### 118 **APP17 does not induce the active state of GB1a/2 receptors**

119 Upon binding of APP17, SD1 adopts a stable conformation (Rice et al., 2019) that possibly  
120 influences GBR activity allosterically. We used a fluorescence resonance energy transfer  
121 (FRET)-based conformational sensor in transfected HEK293 cells to analyze whether APP17  
122 induces the inter-subunit rearrangement associated with GBR activation (Lecat-Guillet et al.,  
123 2017). The FRET sensor is based on GB1a and GB2 subunits fused with ACP and SNAP  
124 (Figure 2A), respectively. These tags are then enzymatically modified with time-resolved  
125 FRET compatible fluorophores (HA-GB1a-ACP with CoA-Lumi4-TB (Donor), Flag-SNAP-  
126 GB2 with SNAP-RED (Acceptor)). This FRET sensor discriminates between GBR agonists  
127 with different efficacies and between PAMs with distinct modes of action (Lecat-Guillet et al.,  
128 2017). For FRET experiments, we used APP17 and sc-APP17 at 1  $\mu\text{M}$  and 10  $\mu\text{M}$ . These  
129 concentrations are above the  $K_D$  of APP17 and comparable to those used in previous  
130 functional experiments (25 nM - 5  $\mu\text{M}$ ) (Rice et al., 2019). As expected, GABA decreased  
131 FRET in a dose-dependent manner (Figure 2B). APP17 at 10  $\mu\text{M}$ , when applied alone  
132 (basal, Figure 2B), significantly increased instead of decreased FRET (Figure 2B,C). This  
133 FRET increase can be rationalized in two ways. First, since GBRs exhibit constitutive activity

Rem et al. Running title: Amyloid- $\beta$  is not a functional GABA<sub>B</sub> ligand

134 (Grunewald et al., 2002; Rajalu et al., 2015), there is an equilibrium between active and  
135 inactive states of the receptor. Constitutive activity decreases basal FRET because a fraction  
136 of receptors is in the active state. Ligands stabilizing the inactive conformation are therefore  
137 increasing basal FRET. Therefore, APP17 is potentially an inverse agonist of GBRs.  
138 However, since all functional experiments reveal no inverse agonistic properties (see below),  
139 APP17 binding to SD1 likely influences the positioning of the SNAP-tag located on top of  
140 GB2, thereby decreasing the mean distance between the fluorophores and increasing FRET  
141 efficacy. Of note, APP17 lacks allosteric properties, as it did not significantly alter GABA  
142 potency (Figure 2D). In summary, the FRET conformational sensor provides no evidence for  
143 APP17 allosterically promoting receptor activation.

144

#### 145 **APP17 does not influence GB1a/2 receptor-mediated G protein activation**

146 We directly tested whether APP17 activates or modulates G protein activation in transfected  
147 HEK293T cells expressing GBRs. We used a bioluminescent resonance energy transfer  
148 (BRET) assay monitoring dissociation of G $\alpha$  from G $\beta\gamma$  upon receptor activation (Turecek et  
149 al., 2014) (Figure 3A). Application of GABA to cells expressing GB1a/2 together with Gao-  
150 RLuc, Venus-Gy2 and G $\beta$ 2 lead to a BRET decrease between Gao-RLuc and Venus-Gy2  
151 (Figure 3A). Subsequent blockade of GB1a/2 receptors by the inverse agonist CGP54626  
152 (Grunewald et al., 2002) increased BRET due to re-association of G protein subunits (Figure  
153 3A). Of note, CGP54626 increased BRET above baseline, consistent with substantial  
154 constitutive activity of GBRs (Grunewald et al., 2002; Rajalu et al., 2015). Accordingly,  
155 application of CGP54626 alone to transfected HEK293T cells also increased BRET (Figure  
156 3A). Application of 10  $\mu$ M GABA did not overcome receptor inhibition by 10  $\mu$ M CGP54626  
157 (Figure 3A). The presence of APP695 *in cis* did not alter constitutive activity of the receptor  
158 (Figure 3A). APP17 and sc-APP17 at 1 or 10  $\mu$ M did not significantly influence receptor  
159 activity while subsequent GABA application to the same cells induced the expected BRET  
160 decrease (Figure 3B). GABA-induced BRET decreases were similar in the presence of  
161 APP17 or sc-APP17 (Figure 3B). These experiments indicate that APP17 at 1 or 10  $\mu$ M

Rem et al. Running title: Amyloid- $\beta$  is not a functional GABA<sub>B</sub> ligand

162 exerts no agonistic, inverse agonistic, antagonistic or allosteric properties at GB1a/2  
163 receptors. Moreover, application of APP17 or sc-APP17 to HEK293T cells expressing  
164 GB1a/2 receptors and APP695 *in cis* or *in trans* had no effect on GBR activity (Figure 3C,D).  
165 Subsequent application of GABA was equally effective in decreasing BRET in the presence  
166 of APP17 or sc-APP17 (Figure 3C,D). These experiments show that APP17 does not  
167 modulate GBR-mediated G protein activation in the absence or presence of APP695.

168

### 169 **APP17 does not influence GB1a/2 receptor-mediated G $\alpha$ signaling**

170 Assays measuring G $\alpha$ i signaling provide another means to study possible functional effects  
171 of APP17 on GBR activity. We analyzed whether APP17 influences GB1a/2-mediated G $\alpha$ i  
172 signaling using an assay monitoring cAMP-dependent Protein Kinase A (PKA) activity in  
173 transfected HEK293T cells. This assay is based on regulatory and catalytic PKA subunits  
174 tagged with the N- or C-terminal fragments of RLuc (R-RLuc-N, C-RLuc-C) (Stefan et al.,  
175 2007). GB1a/2 receptor activation by 10  $\mu$ M GABA inhibits adenylyl cyclase, which  
176 inactivates PKA and increases luminescence due to association of R-RLuc-N with C-RLuc-C  
177 (Figure 4A). Blockade of GB1a/2 receptors with 10  $\mu$ M CGP54626 decreased luminescence  
178 below baseline, again revealing substantial constitutive receptor activity in this assay system  
179 (Figure 4A). APP17 or sc-APP17 at 10  $\mu$ M exhibited no agonistic, inverse agonistic or  
180 antagonistic properties at GB1a/2 receptors in the PKA assay (Figure 4B). GABA-mediated  
181 PKA inactivation was comparable in the presence of APP17 or sc-APP17, again supporting  
182 that APP17 does not act as a PAM (Figure 4B). Moreover, APP17 or sc-APP17 did not  
183 significantly alter GB1/2 receptor activity in the presence of APP695 *in cis* (Figure 4C).

184 It is conceivable that the APP17 concentrations used are not optimal for detecting  
185 functional effects at recombinant GB1a/2 receptors. Therefore, we determined APP17 dose-  
186 response curves using an accumulation assay based on artificially coupling GB1a/2  
187 receptors to phospholipase C (PLC) via chimeric G $\alpha$ <sub>qi</sub> (Conklin et al., 1993) (Figure 5A). PLC  
188 activity was monitored with a serum responsive element-luciferase (SRE-Luciferase) reporter  
189 amplifying the receptor response (Yoo et al., 2017). Increasing concentrations of GABA



Rem et al. Running title: Amyloid- $\beta$  is not a functional GABA<sub>B</sub> ligand

190 yielded similar sigmoidal dose-response curves in the absence and presence of APP695  
191 expressed *in cis* or *in trans* (Figure 5 – figure supplement 1), showing that binding of APP695  
192 does not influence receptor activity. APP17 or sc-APP17 lacked agonistic properties at  
193 concentrations up to 100  $\mu$ M, the highest concentration tested (Figure 5A). CGP54626  
194 blocked constitutive and GABA-induced receptor activity (Figure 5B). APP17 or sc-APP17 at  
195 concentrations of 1 and 10  $\mu$ M did not influence constitutive GB1a/2 receptor activity (Figure  
196 5B). Pre-incubation with 1  $\mu$ M or 10  $\mu$ M of APP17 or sc-APP17 did not significantly influence  
197 the GABA dose-response curve in the absence (Figure 5C) or presence of APP695  
198 expressed *in cis* (Figure 5D), corroborating that the peptides lack agonistic, PAM, inverse  
199 agonistic or antagonistic properties.

200

#### 201 **APP17 peptide does not influence [<sup>35</sup>S]GTP $\gamma$ S binding in brain tissue**

202 Native GBRs form multi-protein complexes with auxiliary proteins (Pin and Bettler, 2016;  
203 Schwenk et al., 2016). It is conceivable that the functional APP17 effects observed in  
204 neurons (Rice et al., 2019) depend on the presence of GBR-associated proteins other than  
205 APP that are absent in heterologous expression systems. Binding of the non-hydrolyzable  
206 GTP analog [<sup>35</sup>S]guanosine-5'-O-(3-thio)triphosphate ([<sup>35</sup>S]GTP $\gamma$ S) to Gai/o in brain  
207 membranes allows to quantify G protein activation by native GBRs (Galvez et al., 2000;  
208 Schuler et al., 2001). GABA dose-response curves for native GBRs in the absence and  
209 presence of 1  $\mu$ M APP17 did not significantly differ from each other and exhibited similar  
210 EC<sub>50</sub> and E<sub>max</sub> values (Figure 6). This finding supports that 1  $\mu$ M APP17 has no agonistic,  
211 inverse agonistic, antagonistic or allosteric effects at native GBRs.

212

#### 213 **APP17 does not influence GBR-activated K<sup>+</sup> currents in neurons and transfected** 214 **HEK293T cells**

215 APP17 signaling through native GBRs may depend on protein-protein interactions that are  
216 not preserved in the membrane preparations used for the [<sup>35</sup>S]GTP $\gamma$ S binding assay.  
217 Therefore, we tested whether APP17 influences GBR-mediated G $\beta\gamma$  signaling to K<sup>+</sup> channels



Rem et al. Running title: Amyloid- $\beta$  is not a functional GABA<sub>B</sub> ligand

218 in cultured hippocampal neurons using patch clamp electrophysiology, which preserves the  
219 native environment of receptors (Schuler et al., 2001; Vigot et al., 2006). Application of 5  $\mu$ M  
220 APP17 or sc-APP17 to hippocampal neurons did not elicit any currents, in contrast to the  
221 same concentration of baclofen (Figure 7A,B). Co-application of APP17 or sc-APP17 with  
222 baclofen elicited currents of similar amplitudes as baclofen alone (Figure 7B,C), indicating  
223 that APP17 exerts no allosteric properties. APP17 or sc-APP17 also did not trigger K<sup>+</sup>  
224 currents in transfected HEK293T cells expressing Kir3 channels, nor did the peptides alter K<sup>+</sup>  
225 currents in the presence of 5  $\mu$ M GABA (Figure 7 – figure supplement 1). These findings  
226 support that APP17 has no agonistic, PAM or antagonistic effects at GBR-activated K<sup>+</sup>  
227 currents.

228

#### 229 **APP17 does not influence evoked EPSC amplitudes in acute hippocampal slices**

230 GB1a/2 receptors are abundant at axon terminals where they inhibit neurotransmitter release  
231 (Vigot et al., 2006). Acute exposure of cultured mouse hippocampal neurons to APP17 at  
232 250 nM was shown to inhibit the mEPSC frequency, consistent with an activation of  
233 presynaptic GB1a/2 receptors (Rice et al., 2019). A GBR antagonist blocked the effect of  
234 APP17 on the mEPSC frequency, supporting a GBR-dependent mechanism. Since all our  
235 experiments thus far showed no functional effects of APP17 at GBRs, we next sought to  
236 replicate the effects of APP17 at presynaptic GBRs. In our experience, the reduction of the  
237 evoked EPSC amplitude provides a better signal-to-noise ratio than the reduction of the  
238 mEPSC frequency for assessing presynaptic GBR activity in the hippocampus. Therefore,  
239 we studied whether APP17 at 1  $\mu$ M influences evoked EPSC amplitudes in acute  
240 hippocampal slices. Postsynaptic GBR-activated K<sup>+</sup> currents were blocked with a Cs<sup>+</sup>-based  
241 intracellular solution, which allowed to specifically analyze the activity of presynaptic GBRs.  
242 Our electrophysiological recordings showed that baclofen but not APP17 was able to reduce  
243 the amplitudes of evoked EPSCs (Figure 8).

244

Rem et al. Running title: Amyloid- $\beta$  is not a functional GABA<sub>B</sub> ligand

245 **APP17 does not influence spontaneous neuronal activity in the auditory cortex of**  
246 **anesthetized mice**

247 Two-photon Ca<sup>2+</sup> imaging showed that APP17 suppresses neuronal activity of CA1  
248 pyramidal cells in anesthetized mice (Rice et al., 2019). We therefore similarly performed  
249 two-photon Ca<sup>2+</sup> imaging experiments in anesthetized transgenic mice to analyze whether  
250 physiological concentrations of APP17 modulate spontaneous activity in cortical neurons,  
251 where the density of GBRs in the brain is high (Bischoff et al., 1999). We crossed Ai95(RCL-  
252 GCaMP6f)-D mice (Madisen et al., 2015) with Nex-Cre mice (Goebbels et al., 2006) to  
253 express the Ca<sup>2+</sup> indicator GCaMP6f under the Nex-promoter, which allowed us to record  
254 Ca<sup>2+</sup> transients in layer 2/3 neurons of the right auditory cortex. APP17, sc-APP17 and  
255 baclofen solutions were perfused over the cortical surface in a fixed sequence (Figure 9A).  
256 To control for potential time-dependent changes of spontaneous activity under isoflurane  
257 anesthesia (Magnuson et al., 2014), we perfused ACSF before and after perfusion of sc-  
258 APP17 and APP17. The results showed that sc-APP17 and APP17 at concentrations of 5  $\mu$ M  
259 had no significant effect compared to ACSF, even after 60 minutes of perfusion (Figure 9D,E,  
260 Figure 9 – figure supplement 1). In contrast, 5  $\mu$ M of baclofen reduced spontaneous Ca<sup>2+</sup>  
261 transients after 15 minutes of perfusion. Therefore, we were unable to confirm that APP17  
262 influences neuronal activity *in vivo*.

263

264 **Discussion**

265 Proteolytic processing of APP through the non-amyloidogenic pathway liberates sAPP, which  
266 modulates synaptic functions, presumably by acting at neuronal cell surface receptors (Ishida  
267 et al., 1997; Bour et al., 2004; Taylor et al., 2008; Claasen et al., 2009; Aydin et al., 2011;  
268 Hick et al., 2015; Muller et al., 2017; Richter et al., 2018). Nanomolar concentrations of sAPP  
269 were shown to have PAM activity at heterologously expressed  $\alpha$ 7 nicotinic acetylcholine  
270 receptors, suggesting that nicotinic receptors mediate some of the effects of sAPP (Richter et  
271 al., 2018). Recent experiments identified GB1a/2 receptors as receptors for sAPP (Rice et

Rem et al. Running title: Amyloid- $\beta$  is not a functional GABA<sub>B</sub> ligand

272 al., 2019). GB1a/2 receptors are predominantly expressed at presynaptic sites, where they  
273 control neurotransmitter release (Vigot et al., 2006). It was shown that sAPP and APP17, a  
274 peptide of 17 amino acids corresponding to the SD1 binding-site of APP, reduce the  
275 frequency of mEPSCs and inhibit neuronal activity (Rice et al., 2019). While these findings  
276 received much attention and are consistent with activation of GBRs (Haass and Willem,  
277 2019; Korte, 2019; Tang, 2019; Yates, 2019), fundamental questions remained. For  
278 example, it is unclear how a conformational change in SD1, induced by sAPP or APP17  
279 binding, increases GBR activity. High-resolution structures of the GBR heterodimer in the  
280 apo, antagonist-bound, agonist-bound and agonist- and PAM-bound states in complex with  
281 the G protein are available and provide detailed insights into the activation mechanism of  
282 GBRs (Mao et al., 2020; Papasergi-Scott et al., 2020; Park et al., 2020; Shaye et al., 2020;  
283 Shaye et al., 2021; Shen et al., 2021). These structures show that the N-terminal SD1 is  
284 neither part of the binding sites for orthosteric or allosteric ligands, nor alters pharmacological  
285 receptor properties (Kaupmann et al., 1998) or participates in receptor activation (Evenseth  
286 et al., 2020; Shaye et al., 2021). Therefore, there is no straightforward explanation for  
287 potential functional effects of sAPP or APP17 at GBRs. Moreover, Rice and colleagues (Rice  
288 et al., 2019) did not analyze whether sAPP or APP17 regulate GB1a/2 receptors in  
289 heterologous cells, which is important to demonstrate a direct action at the receptor. In fact,  
290 in an earlier report showing interaction of native GBRs with APP, we found no evidence for  
291 recombinant sAPP protein regulating GB1a/2 receptors expressed in heterologous cells  
292 (Dinamarca et al., 2019). However, native GBRs form receptor complexes with additional  
293 proteins (Pin and Bettler, 2016; Schwenk et al., 2016; Bettler and Fakler, 2017) and these  
294 proteins could be necessary for the observed effects of APP17 on receptor activity.

295 The aim of this study was to clarify whether APP17 can activate recombinant and/or  
296 native GBRs. We could confirm that APP17 binds to purified recombinant SD1/2 protein, with  
297 a  $K_D$  of 543 nM that is similar to the  $K_D$  determined earlier (Rice et al., 2019). For functional  
298 experiments in HEK293T we used a range of established cell-based GBR assays reporting  
299 (1) conformational changes associated with receptor activation, (2) G protein activation, (2)

Rem et al. Running title: Amyloid- $\beta$  is not a functional GABA<sub>B</sub> ligand

300 cAMP inhibition and (4) Kir3 channel activation. In all these assays, APP17 had no agonistic,  
301 PAM or antagonistic properties at GB1/2 receptors. APP17 also did not influence constitutive  
302 GBR activity in the presence or absence of APP695 that competes with APP17 for binding at  
303 SD1. APP17 also did not modulate native GBRs in experiments assessing G protein  
304 activation in brain membranes, activation of K<sup>+</sup> currents in cultured neurons, neurotransmitter  
305 release in acute hippocampal slices and neuronal activity in living mice. Thus, all our findings  
306 are consistent with a complete lack of functional effects of APP17 at GB1a/2 receptors,  
307 confirming the lack of functional effects observed with sAPP earlier (Dinamarca et al., 2019).  
308 The lack of functional effects is not due to a faulty APP17 peptide, since the APP17 peptide  
309 used in functional experiments was validated for binding recombinant SD1/2 protein and  
310 GB1a/2 receptors expressed in HEK293T cells. In all our experiments, we used GABA or  
311 baclofen to control for receptor activity. It therefore appears that sAPP mediates its neuronal  
312 effects through receptors other than GBRs. APP binding to GBRs probably mainly evolved to  
313 control receptor trafficking in axons and stabilize APP and GB1a/2 receptors at the cell  
314 surface (Hannan et al., 2012; Dinamarca et al., 2019). In principle, it is possible that sAPP  
315 interferes with the APP/GB1a interaction at the cell surface, which could lead to a  
316 downregulation of presynaptic GB1a/2 receptors and disinhibition of neurotransmitter  
317 release. However, the concentration of the abundant sAPP $\alpha$  variant in the interstitial fluid  
318 reaches ~ 1 nM (Dobrowolska et al., 2014). Considering a K<sub>D</sub> of 183 nM for the APP  
319 interaction with GB1a (Dinamarca et al., 2019), it is unlikely that endogenous levels of sAPP  
320 would reach concentrations high enough to displace APP from GB1a/2 receptors or to  
321 directly activate the receptor.

322

## 323 **Materials and methods**

### 324 *Plasmids and reagents*

325 The following plasmids were used: Flag-GB1a (Adelfinger et al., 2014); Flag-GB2, APP695  
326 (Dinamarca et al., 2019); G $\alpha_o$ -RLuc, Venus-G $\gamma_2$  (Ayoub et al., 2009); Flag-G $\beta_2$  (Rajalu et al.,  
327 2015); Myc-GB1a, HA-GB2 (Pagano et al., 2001); Kir3.1/Kir3.2 concatamer (Wischmeyer et

Rem et al. Running title: Amyloid- $\beta$  is not a functional GABA<sub>B</sub> ligand

328 al., 1997); PKA-Reg-RLuc-NT, PKA-Cat-RLuc-CT (Stefan et al., 2007) and SRE-FLuc  
329 (Cheng et al., 2010). GABA, CGP54626, forskolin, picrotoxin, and tetrodotoxin (TTX) were  
330 from Tocris Bioscience, Bristol, England.

331

### 332 *Peptide characterization*

333 APP17 (Ac-DDSDVWWGGADTDYADG-NH<sub>2</sub> (Rice et al., 2019)) and sc-APP17 (acetyl-  
334 DWGADTVSGDGYDAWDD-amide) peptides were from Insight Biotechnology, London,  
335 England (>98% purity). ESI-LC-MS (Poroshell, 300SB-C18, 2.1 × 75 mm, Agilent  
336 Technologies, Santa Clara, United States of America) and RP-UPLC (Acquity, Waters  
337 Corporation, Milford, United States of America) were used to confirm peptide mass and  
338 purity, respectively. ITC experiments were carried out in a microcalorimeter (Microcal  
339 ITC200, GE healthcare, Chicago, United States of America) at 25 °C with a stirring speed of  
340 600 rpm in a buffer containing 20 mM NaPi (pH 6.8), 50 mM NaCl and 0.5 mM EDTA. For  
341 titration, APP17 or sc-APP17 (each 300 μM) were injected (first injection 0.5 μl, followed by  
342 25 injections of 1.5 μl) into the sample cell containing purified recombinant SD1/2 protein (30  
343 μM) (Schwenk et al., 2016). Control measurements of peptide versus buffer were subtracted  
344 from the peptide versus SD1/2 measurements. Data were analyzed with Microcal ITC200  
345 Origin software, using a one-site binding model.

346

### 347 *Cell lines*

348 Human Embryonic Kidney 293T (HEK293T) were directly obtained from ATCC  
349 ([https://web.expasy.org/cellosaurus/CVCL\\_0063](https://web.expasy.org/cellosaurus/CVCL_0063)) and maintained in DMEM supplemented  
350 with 10% FBS (GE Healthcare) and 2% penicillin/streptomycin (Sigma-Aldrich, St. Louis,  
351 United States of America) at 37°C with 5% CO<sub>2</sub>. HEK293T cells stably expressing Gα<sub>qi</sub> were  
352 a gift from the laboratory of Murim Choi (Seoul National University College of Medicine,  
353 Republic of Korea) (Yoo et al., 2017). All cell lines were authenticated using Short Tandem  
354 Repeat (STR) analysis by Microsynth (Switzerland) and tested negative for mycoplasma  
355 contamination.

Rem et al. Running title: Amyloid- $\beta$  is not a functional GABA<sub>B</sub> ligand

356

357 *Cell culture and transfection*

358 HEK293T cells were transiently transfected in Opti-MEM™ (Gibco, Thermo Fisher Scientific)  
359 using Lipofectamine™ 2000 (Thermo Fisher Scientific). The total amount of transfected DNA  
360 was kept equal by supplementing with pCI plasmid DNA (Promega, Madison, United States  
361 of America). For electrophysiological recordings, transfected cells were seeded on poly-L-  
362 lysine (Sigma-Aldrich) coated coverslips. Transfected cells were identified by their EGFP  
363 fluorescence. To establish primary cultures of hippocampal neurons, pregnant RjOrl:SWISS  
364 mice (Janvier Labs, France) were sacrificed under anesthesia by decapitation (Animal  
365 license number 1897\_31476, approved by the Veterinary Office of Basel-Stadt, Switzerland).  
366 Dissected hippocampi of E17/18 embryos were collected in HBSS (Gibco, Thermo Fisher  
367 Scientific) and dissociated with 0.25% trypsin (Invitrogen, Thermo Fisher Scientific) at 37°C  
368 for 10 min. Cells were suspended in dissection medium [MEM Eagle (Sigma-Aldrich); 0.5%  
369 D(+)-glucose; 10% horse serum (Gibco, Thermo Fisher Scientific); 0.1% Pen-Strep (Sigma-  
370 Aldrich)] to block trypsin activity. Cells were plated on 13 mm cell culture coverslips coated  
371 with 0.01 mg/ml poly-L-lysine hydrobromide (Sigma-Aldrich) at a density of 50,000 cells/cm<sup>2</sup>.  
372 Two hours after dissection, the medium was replaced with Neurobasal™ Medium (Gibco,  
373 Thermo Fisher Scientific) supplemented with B-27™ (Gibco, Thermo Fisher Scientific) and  
374 GlutaMAX™ (Thermo Fisher Scientific). Primary hippocampal neurons were maintained in a  
375 humidified incubator with 5% CO<sub>2</sub> at 37 °C.

376

377 *APP17-TMR binding experiments*

378 Transfected HEK293T cells expressing Flag-GB1a and Flag-GB2 were seeded into 96-well  
379 microplates (Greiner Bio-One, Kremsmünster, Austria) at 50,000 cells/well. After 18 hrs,  
380 peptides were mixed with conditioned medium at the following final concentrations: APP17-  
381 TMR (1  $\mu$ M) with either APP17 (10  $\mu$ M), sc-APP17 (10  $\mu$ M) or PBS (vehicle); sc-APP17-TMR  
382 (1  $\mu$ M) in PBS was used as a negative control. After removal of medium, peptide mixes were  
383 added to the wells and cells incubated in the dark for 1 hr at RT. After removal of the

Rem et al. Running title: Amyloid- $\beta$  is not a functional GABA<sub>B</sub> ligand

384 peptides, PBS with MgCl<sub>2</sub> and CaCl<sub>2</sub> (Sigma-Aldrich) was added to the wells. TMR  
385 fluorescence was monitored with a Spark® microplate reader (Tecan Group, Männerdorf,  
386 Switzerland) using a monochromator (Excitation 544 nm, 20 nm bandwidth; detection 594  
387 nm, 25 nm bandwidth). TMR fluorescence was determined after subtraction of the sc-APP17-  
388 TMR fluorescence measured at HEK293T cells transfected with pCI plasmid.

389

#### 390 *FRET measurements*

391 Single and combined labelling of SNAP- and ACP-tag were performed as described  
392 previously (Lecat-Guillet et al., 2017). Briefly, 24 hrs after transfection, cells were incubated  
393 for 24 hrs at 30°C. The medium was removed and cells were incubated with 500 nM of  
394 SNAP-Red in Tag-Lite Buffer (Perkin Elmer Cisbio) for 1 hr at 37°C. Cells were washed once  
395 and incubated with 10 mM MgCl<sub>2</sub>, 1 mM DTT, 2 $\mu$ M CoA-Lumi4-Tb (Perkin Elmer Cisbio) and  
396 Sfp synthase (New England Biolabs) in Tag-Lite Buffer for 1 hr at 30°C. Cells were washed  
397 three times and APP17 or scAPP17 were added either alone or together with GABA in Tag-  
398 Lite Buffer. TR-FRET measurements were performed in Greiner black 96-well plates, using a  
399 PHERAstar FS microplate reader. After excitation with a laser at 337 nm (40 flashes per  
400 well), the fluorescence was collected at 620 nm (donor signal) and 665 nm (sensitized  
401 acceptor signal). The acceptor ratio was calculated using the sensitized acceptor signal  
402 integrated over the time window [50  $\mu$ sec - 100  $\mu$ sec], divided by the sensitized acceptor  
403 signal integrated over the time window [900  $\mu$ sec - 1150  $\mu$ sec].

404

#### 405 *BRET measurements*

406 BRET experiments were performed as described (Ivankova et al., 2013; Turecek et al., 2014;  
407 Dinamarca et al., 2019). HEK293T cells were transiently transfected with Flag-GB1a, Flag-  
408 GB2, G $\alpha_0$ -RLuc, G $\beta_2$  and Venus-G $\gamma_2$  plasmids with or without APP695. In order to ensure  
409 APP695 binding to GB1a/2 *in trans* a pool of HEK293T cells expressing APP695 was mixed  
410 with a pool of HEK293T cells expressing Flag-GB1a, Flag-GB2, G $\alpha_0$ -RLuc, G $\beta_2$  and Venus-  
411 G $\gamma_2$ . Transfected cells were seeded into 96-well microplates (Greiner Bio-One) at 100,000



Rem et al. Running title: Amyloid- $\beta$  is not a functional GABA<sub>B</sub> ligand

412 cells/well. After 18 hrs, cells were washed and coelenterazine h (5  $\mu$ M, NanoLight  
413 Technologies, Prolume Ltd., Pinetop-Lakeside, United States of America) added for 5 min.  
414 Luminescence and fluorescence signals were alternatively recorded for a total of 845 sec  
415 using a Spark® microplate reader. Peptide, GABA or CGP54626 were injected with the  
416 Spark® microplate reader injection system at either 146 or 457 sec. The BRET ratio was  
417 calculated as the ratio of the light emitted by Venus-G $\gamma_2$  (530 – 570 nm) over the light emitted  
418 by G $\alpha_o$ -RLuc (370 – 470 nm). BRET ratios were adjusted by subtracting the ratios obtained  
419 when RLuc fusion proteins were expressed alone. Each data point represents a technical  
420 quadruplicate.

421

#### 422 *PKA assay*

423 PKA measurements were performed as described in (Stefan et al., 2007). HEK293T cells  
424 were transiently transfected with Flag-GB1a, Flag-GB2, PKA-Reg-RLuc-NT and PKA-Cat-  
425 RLuc-CT with or without APP695. Transfected cells were distributed into 96-well microplates  
426 (Greiner Bio-One) at a density of 80,000 cells/well. After 42 hrs, cells were washed and  
427 coelenterazine h (5  $\mu$ M, NanoLight Technologies) added for 5 min. Luminescence signals  
428 were detected for a total of 1276 sec using a Spark® microplate reader. To induce PKA  
429 dissociation, 1 mM forskolin was added manually at 108 sec. Peptide, GABA or CGP54626  
430 were injected at either 529 or 905 sec. Luminescence signals were adjusted to luminescence  
431 signals obtained by injecting PBS at 529 and 905 sec. The luminescence was normalized to  
432 baseline luminescence. Curves were plotted after forskolin addition and the time point 71 sec  
433 prior the first injection was set to 0. Each data point represents a technical quadruplicate.

434

#### 435 *SRE-luciferase accumulation assay*

436 HEK293T cells stably expressing G $\alpha_{qi}$  were transiently transfected with Flag-GB1a, Flag-  
437 GB2 and SRE-FLuc with or without APP695. In order to ensure GB1a/2 binding of APP695 *in*  
438 *trans* a pool of HEK293-G $\alpha_{qi}$  cells expressing APP695 was mixed with HEK293-G $\alpha_{qi}$  cells  
439 expressing Flag-GB1a, Flag-GB2 and SRE-FLuc. Transfected cells were distributed into 96-

Rem et al. Running title: Amyloid- $\beta$  is not a functional GABA<sub>B</sub> ligand

440 well microplates (Greiner Bio-One) at a density of 80,000 cells/well. After 24 hr, the culture  
441 medium was replaced with Opti-MEM™-GlutaMAX™. Peptides were incubated in Opti-  
442 MEM™-GlutaMAX™ for 1 hr. In presence of peptide, GB1a/2 receptors were activated with  
443 various concentrations of GABA for 15 hr. FLuc activity in lysed cells was measured using  
444 the Luciferase® Assay Kit (Promega) using a Spark® microplate reader. Luminescence  
445 signals were adjusted by subtracting the luminescence obtained when expressing SRE-FLuc  
446 fusion proteins alone.

447

#### 448 *Electrophysiology*

449 Neuronal cultures and HEK293T cells were prepared as described (Dinamarca et al., 2019).  
450 Coverslips with hippocampal neurons (DIV 12-15) or HEK293T cells were transferred to a  
451 chamber containing a low-K<sup>+</sup> bath solution (in mM): 145 NaCl, 4 KCl, 5 HEPES, 5.5 D-  
452 glucose, 1 MgCl<sub>2</sub> and 1.8 CaCl<sub>2</sub> (pH 7.4 adjusted with NaOH). Recordings were performed at  
453 room temperature using borosilicate pipettes of 3-5 M $\Omega$  resistance tips, filled with K-  
454 gluconate-based pipette solution (in mM): 150 K-gluconate, 1.1 EGTA, 10 HEPES, 10 Tris-  
455 phosphocreatine, 0.3 NaGTP and 4 MgATP (pH 7.2 adjusted with KOH). Upon achieving  
456 whole-cell access, cells were held in voltage-clamp mode at -70 mV (with no correction for  
457 liquid junction potential) and baclofen-induced K<sup>+</sup> currents were induced in a high-K<sup>+</sup> bath  
458 solution (in mM): 120 NaCl, 25 KCl, 5 HEPES, 5.5 D-glucose, 1 MgCl<sub>2</sub> and 1.8 CaCl<sub>2</sub> (pH 7.4  
459 adjusted with NaOH). Whole-cell patch-clamp recordings from visually identified CA1  
460 pyramidal cells in acute hippocampal slices of juvenile male and female C57BL/6JRj mice  
461 (Janvier Labs, France) were performed as described (Vigot et al., 2006) (animal license  
462 number 1897\_31476, approved by the Veterinary Office of Basel-Stadt, Switzerland).  
463 Schaffer collaterals were stimulated at 0.1 Hz with brief current pulses via bipolar Pt/Ir wires.  
464 Evoked EPSCs were recorded at -60 mV with a Cs<sup>+</sup>-based intracellular solution. Baclofen  
465 and peptides were bath applied in standard ACSF at room temperature.

466

Rem et al. Running title: Amyloid- $\beta$  is not a functional GABA<sub>B</sub> ligand

467 [<sup>35</sup>S]GTP $\gamma$ S binding

468 Preparation of mouse brain membranes was performed as described earlier (Olpe et al.,  
469 1990). Briefly, 8 weeks old male C57BL/6JRj mice (Janvier Labs, France) were decapitated  
470 under isoflurane anesthesia (animal license number 1897\_31476, approved by the  
471 Veterinary Office of Basel-Stadt, Switzerland). The brains were removed, washed in ice-cold  
472 PBS and homogenized in 10 volumes of ice-cold 0.32 M sucrose, containing 4 mM HEPES,  
473 1 mM EDTA and 1 mM EGTA, using a glass-teflon homogenizer. Debris was removed at  
474 1,000 g for 10 min and membranes were centrifuged at 26,000 g for 15 min. The pellet was  
475 osmotically shocked by re-suspension in a 10-fold volume of ice-cold H<sub>2</sub>O and kept on ice for  
476 1 hr. The suspension was centrifuged at 38,000 g for 20 min and re-suspended in a 3-fold  
477 volume of H<sub>2</sub>O. Aliquots were frozen in liquid nitrogen and stored at -20°C for 48 hrs. After  
478 thawing at room temperature, a 7-fold volume of Krebs-Henseleit (KH) buffer (pH 7.4) was  
479 added, containing 20 mM Tris-HCl, 118 mM NaCl, 5.6 mM glucose, 4.7 mM KCl, 1.8 mM  
480 CaCl<sub>2</sub>, 1.2 mM KH<sub>2</sub>PO<sub>4</sub> and 1.2 mM MgSO<sub>4</sub>. Membranes were washed three times by  
481 centrifugation at 26,000 g for 15 min, followed by re-suspension in KH buffer. The final pellet  
482 was re-suspended in a 5-fold volume of KH buffer. Aliquots of 2 ml were frozen and stored  
483 at -80 °C until the day of the experiment. On the day of the experiment, frozen membranes  
484 were thawed, homogenized in 10 ml ice-cold assay buffer I containing 50 mM Tris-HCl buffer  
485 (pH 7.7); 10 mM MgCl<sub>2</sub>, 1.8 mM CaCl<sub>2</sub>, 100 mM NaCl, and centrifuged at 20,000 g for  
486 15 min. The pellet was re-suspended in the same volume of cold buffer and centrifuged twice  
487 as above with 30 min of incubation on ice in between the centrifugation steps. The resulting  
488 pellet was re-suspended in 150  $\mu$ l of assay buffer II (per point) containing 50 mM Tris-HCl  
489 buffer (pH 7.7); 10 mM MgCl<sub>2</sub>, 1.8 mM CaCl<sub>2</sub>, 100 mM NaCl, 30  $\mu$ M guanosine 5'-  
490 diphosphate (GDP; Sigma-Aldrich) and 20  $\mu$ g of total membrane protein. To this, 8  $\mu$ M of the  
491 APP17 peptide was added in 25  $\mu$ l of phosphate buffer (50 mM sodium phosphate, pH 6.8,  
492 50 mM NaCl, for + APP17) or 25  $\mu$ l of phosphate buffer alone (for - APP17) and incubated  
493 for 30 min. The reaction was started by adding various concentrations of GABA and 0.2 nM  
494 of [<sup>35</sup>S]GTP $\gamma$ S (PerkinElmer, Waltham, United States of America) in a final volume of 200  $\mu$ l

Rem et al. Running title: Amyloid- $\beta$  is not a functional GABA<sub>B</sub> ligand

495 per point and assayed as described earlier (Rajalu et al., 2015). Non-specific binding was  
496 measured in the presence of unlabeled GTP $\gamma$ S (10  $\mu$ M; Sigma-Aldrich). The reagents were  
497 incubated for 1 hr at room temperature in 96-well polypropylene microplates (Greiner Bio-  
498 One) with mild shaking. They were subsequently filtered using 96-well Whatman GF/C glass  
499 fiber filters (PerkinElmer), pre-soaked in assay buffer, using a Filtermate cell harvester  
500 (PerkinElmer). After four washes with assay buffer, the Whatman filter fibers were dried for 2  
501 hrs at 50 °C. 50  $\mu$ l of scintillation fluid (MicroScint™-20; PerkinElmer) was added, the plates  
502 were shaken for 1 hr and thereafter counted using a Packard TopCount NXT (PerkinElmer).

503

#### 504 *In vivo two-photon Ca<sup>2+</sup> imaging of auditory cortex*

505 Ca<sup>2+</sup> imaging experiments were approved by the Veterinary Office of Basel-Stadt,  
506 Switzerland (animal license number 3004\_34045). We crossed Ai95(RCL-GCaMP6f)-D mice  
507 (Madisen et al., 2015) (RRID:IMSR\_JAX:028865) with Nex-Cre mice (Goebbels et al., 2006)  
508 to obtain GCaMP6f expression in cortical neurons. 9-12 weeks old male mice were  
509 anesthetized with isoflurane (4% induction, 1.5–2.5% surgery, 1% optical imaging). 3.2  
510 mg/kg dexamethasone was administered intraperitoneally 48, 24 and 1 hr prior to surgery to  
511 prevent brain swelling. Bupivacaine/lidocaine (0.01/0.04 mg) was injected subcutaneously for  
512 analgesia. An imaging chamber was created with cement above right auditory cortex (rACx)  
513 and a post fixed on the skull of the left hemisphere. A craniotomy (1.5 x 1.5mm<sup>2</sup>) above rACx  
514 was carefully opened and duratomy was performed. For optical imaging, the post was stably  
515 fixed on a stage and the head tilted 30° for optimal access to the rACx. The imaging chamber  
516 was perfused at 1ml / min using a peristaltic pump. All solutions were kept at 37°C for 1 hr  
517 prior to perfusion. Two-photon Ca<sup>2+</sup> imaging periods (5 min each) started 45 min after the  
518 first ACSF perfusion, 60 min after sc-APP17, second ACSF, APP17 and third ACSF  
519 perfusion and 15 min after baclofen perfusion. Ca<sup>2+</sup> transients of neuronal cell bodies in the  
520 upper layers of rACx (focal depth: 150 - 250  $\mu$ m) were recorded with a two-photon  
521 microscope (INSS) equipped with an 8 kHz resonant scanner. Images were acquired with a  
522 PXI-1073-based data acquisition system (NI) through a Nikon 16x objective (0.8 NA), at

Rem et al. Running title: Amyloid- $\beta$  is not a functional GABA<sub>B</sub> ligand

523 30Hz within a 500 x 500  $\mu$ m field of view (512 x 512 pixels). The wavelength to excite  
524 GCaMP6f was 940 nm (Chameleon Vision-S, Coherent). We used the optical imaging control  
525 and data acquisition software ScanImage 5.7 (Pologruto et al., 2003). Correction of Z-drift  
526 and motion artifacts, detection of neuronal cell bodies and extraction of Ca<sup>2+</sup> signals was with  
527 the Python 3 based image processing pipeline suite2p (Pachitariu et al., 2017). Data analysis  
528 visualization and statistics were performed using custom-written MATLAB scripts  
529 (Mathworks, Natick, MA). Automated detection of Ca<sup>2+</sup> transients was with an adapted  
530 algorithm (Sorensen et al., 2017). First, the fluorescence signal was corrected by the median  
531 filtered data removing slow trends. The detection threshold was set to 2.5 times the standard  
532 deviation and a minimum peak width of 3 data points above threshold to remove fast  
533 artifacts.  $\Delta F/F$  was calculated as  $(F-F_0)/F_0$ , where  $F_0$  is the mean fluorescence across all  
534 detected neurons in a given condition. The rates of Ca<sup>2+</sup> transients representing the recorded  
535 neuronal populations for each condition were plotted as the empirical cumulative distribution  
536 function with 95% confidence intervals.

537

### 538 *Statistical analysis*

539 Data was analyzed with GraphPad Prism version 8 (GraphPad, San Diego, United States of  
540 America) if not indicated otherwise. Sample size in all experiments was based on those of  
541 similar experiments in previous studies. Samples were randomly allocated to the  
542 experimental groups. Confounding effects in the cell-based assays (Figs. 2-5) were  
543 minimized by rotating the order of cell plating. Blinding was not performed for any  
544 experiment. Individual data sets were tested for normality with the Shapiro-Wilk or  
545 D'Agostino-Pearson test (for  $n \geq 8$ ). For the datasets obtained with the cell-based assays  
546 (Figs. 2-5) outliers were identified using the ROUT method with  $Q = 1\%$ . For all other  
547 experiments, no data was excluded. Statistical significance of data sets against 0 or 100 was  
548 assessed by one sample t-test. For non-normal distribution, the non-parametric one sample  
549 Wilcoxon test was used. Statistical significance between two groups containing one variable

Rem et al. Running title: Amyloid- $\beta$  is not a functional GABA<sub>B</sub> ligand

550 was assessed by student's t-test. Statistical significance between three or more groups  
551 containing one variable was assessed by ordinary or paired one-way ANOVA with Holm-  
552 Sidak's multiple comparisons test. For non-normal distribution, the non-parametric Friedman  
553 test with Dunn's multiple comparisons test was used. Statistical significance between groups  
554 containing two variables was assessed by ordinary two-way ANOVA with Sidak's multiple  
555 comparisons test. Statistical significance between dose-response curves was assessed by  
556 extra sum-of-squares F test of non-linear regression curve fits. P-values < 0.05 were  
557 considered significant. Data are presented as mean  $\pm$  standard error of mean (SEM) or mean  
558  $\pm$  standard deviation (SD) as indicated in the figure legends.

559

#### 560 *Data availability*

561 For all figures, numerical data that are represented in graphs are provided as source data  
562 excel files.

563

#### 564 *Acknowledgments*

565 The Swiss National Science Foundation (31003A-152970 to B.B.) supported this work.  
566 P.D.R., P.R., J.-P.P., J.S., B.F., M.G., T.R .B., K.S. and B.B. conceived the project. P.D.R.,  
567 V.S., S.R., D.F.-F., D U., T.F., L T., S.R., Z.C., and M.G. performed experiments. P.D.R. and  
568 B.B. wrote the manuscript with the help of the other authors. B.B. is a member of the  
569 scientific advisory board of Addex Therapeutics, Geneva. K.S. is a co-founder and a part-  
570 time employee of Avilex Pharma. All other authors declare no conflict of interest.

Rem et al. Running title: Amyloid- $\beta$  is not a functional GABA<sub>B</sub> ligand

571 **References**

- 572 Adelfinger L, Turecek R, Ivankova K, Jensen AA, Moss SJ, Gassmann M, Bettler B (2014)  
573 GABA<sub>B</sub> receptor phosphorylation regulates KCTD12-induced K<sup>+</sup> current  
574 desensitization. *Biochem Pharmacol* **91**:369-379.  
575 <https://doi.org/10.1016/j.bcp.2014.07.013>
- 576 Aydin D, Filippov MA, Tschape JA, Gretz N, Prinz M, Eils R, Brors B, Muller UC (2011)  
577 Comparative transcriptome profiling of amyloid precursor protein family members in  
578 the adult cortex. *BMC Genomics* **12**:160. <https://doi.org/10.1186/1471-2164-12-160>
- 579 Ayoub MA, Damian M, Gespach C, Ferrandis E, Lavergne O, De Wever O, Baneres JL, Pin  
580 JP, Prevost GP (2009) Inhibition of heterotrimeric G protein signaling by a small  
581 molecule acting on G $\alpha$  subunit. *J Biol Chem* **284**:29136-29145.  
582 <https://doi.org/10.1074/jbc.M109.042333>
- 583 Barthet G, Mulle C (2020) Presynaptic failure in Alzheimer's disease. *Prog Neurobiol*  
584 **194**:101801. <https://doi.org/10.1016/j.pneurobio.2020.101801>
- 585 Bettler B, Fakler B (2017) Ionotropic AMPA-type glutamate and metabotropic GABA<sub>B</sub>  
586 receptors: determining cellular physiology by proteomes. *Curr Opin Neurobiol* **45**:16-  
587 23. <https://doi.org/10.1016/j.conb.2017.02.011>
- 588 Bischoff S, Leonhard S, Reymann N, Schuler V, Shigemoto R, Kaupmann K, Bettler B (1999)  
589 Spatial distribution of GABA<sub>B</sub>R1 receptor mRNA and binding sites in the rat brain. *J*  
590 *Comp Neurol* **412**:1-16. [https://doi.org/10.1002/\(SICI\)1096-9861\(19990913\)412:1](https://doi.org/10.1002/(SICI)1096-9861(19990913)412:1)
- 591 Bour A, Little S, Dodart JC, Kelche C, Mathis C (2004) A secreted form of the beta-amyloid  
592 precursor protein (sAPP695) improves spatial recognition memory in OF1 mice.  
593 *Neurobiol Learn Mem* **81**:27-38. [https://doi.org/10.1016/s1074-7427\(03\)00071-6](https://doi.org/10.1016/s1074-7427(03)00071-6)
- 594 Cheng Z, Garvin D, Paguio A, Stecha P, Wood K, Fan F (2010) Luciferase reporter assay  
595 system for deciphering GPCR pathways. *Curr Chem Genomics* **4**:84-91.  
596 <https://doi.org/10.2174/1875397301004010084>
- 597 Claasen AM, Guevremont D, Mason-Parker SE, Bourne K, Tate WP, Abraham WC, Williams  
598 JM (2009) Secreted amyloid precursor protein-alpha upregulates synaptic protein



Rem et al. Running title: Amyloid- $\beta$  is not a functional GABA<sub>B</sub> ligand

- 599 synthesis by a protein kinase G-dependent mechanism. *Neurosci Lett* **460**:92-96.  
600 <https://doi.org/10.1016/j.neulet.2009.05.040>
- 601 Conklin BR, Farfel Z, Lustig KD, Julius D, Bourne HR (1993) Substitution of three amino  
602 acids switches receptor specificity of Gq alpha to that of Gi alpha. *Nature* **363**:274-  
603 276. <https://doi.org/10.1038/363274a0>
- 604 Dinamarca MC, Raveh A, Schneider A, Fritzius T, Fruh S, Rem PD, Stawarski M, Lalanne T,  
605 Turecek R, Choo M, Besseyrias V, Bildl W, Bentrop D, Staufenbiel M, Gassmann M,  
606 Fakler B, Schwenk J, Bettler B (2019) Complex formation of APP with GABA<sub>B</sub>  
607 receptors links axonal trafficking to amyloidogenic processing. *Nat Commun* **10**:1331.  
608 <https://doi.org/10.1038/s41467-019-09164-3>
- 609 Dobrowolska JA et al. (2014) CNS amyloid-beta, soluble APP-alpha and -beta kinetics during  
610 BACE inhibition. *J Neurosci* **34**:8336-8346.  
611 <https://doi.org/10.1523/JNEUROSCI.0540-14.2014>
- 612 Evenseth LSM, Gabrielsen M, Sylte I (2020) The GABA<sub>B</sub> receptor-structure, ligand binding  
613 and drug development. *Molecules* **25**. <https://doi.org/10.3390/molecules25133093>
- 614 Feng M, Song Y, Chen SH, Zhang Y, Zhou R (2021) Molecular mechanism of secreted  
615 amyloid-beta precursor protein in binding and modulating GABA<sub>B</sub>R1a. *Chem Sci*  
616 **12**:6107-6116. <https://doi.org/10.1039/d0sc06946a>
- 617 Galvez T, Urwyler S, Prezeau L, Mosbacher J, Joly C, Malitschek B, Heid J, Brabet I, Froestl  
618 W, Bettler B, Kaupmann K, Pin JP (2000) Ca<sup>2+</sup> requirement for high-affinity gamma-  
619 aminobutyric acid (GABA) binding at GABA<sub>B</sub> receptors: involvement of serine 269 of  
620 the GABA<sub>B</sub>R1 subunit. *Mol Pharmacol* **57**:419-426.  
621 <https://doi.org/10.1124/mol.57.3.419>
- 622 Gassmann M, Bettler B (2012) Regulation of neuronal GABA<sub>B</sub> receptor functions by subunit  
623 composition. *Nat Rev Neurosci* **13**:380-394. <https://doi.org/10.1038/nrn3249>
- 624 Goebbels S, Bormuth I, Bode U, Hermanson O, Schwab MH, Nave KA (2006) Genetic  
625 targeting of principal neurons in neocortex and hippocampus of NEX-Cre mice.  
626 *Genesis* **44**:611-621. <https://doi.org/10.1002/dvg.20256>

Rem et al. Running title: Amyloid- $\beta$  is not a functional GABA<sub>B</sub> ligand

- 627 Grunewald S, Schupp BJ, Ikeda SR, Kuner R, Steigerwald F, Kornau HC, Kohr G (2002)  
628 Importance of the gamma-aminobutyric acid<sub>B</sub> receptor C-termini for G-protein  
629 coupling. *Mol Pharmacol* **61**:1070-1080. <https://doi.org/10.1124/mol.61.5.1070>
- 630 Haass C, Willem M (2019) Secreted APP modulates synaptic activity: A novel target for  
631 therapeutic intervention? *Neuron* **101**:557-559.  
632 <https://doi.org/10.1016/j.neuron.2019.01.058>
- 633 Hannan S, Wilkins ME, Smart TG (2012) Sushi domains confer distinct trafficking profiles on  
634 GABA<sub>B</sub> receptors. *Proc Natl Acad Sci U S A* **109**:12171-12176.  
635 <https://doi.org/10.1073/pnas.1201660109>
- 636 Hick M, Herrmann U, Weyer SW, Mallm JP, Tschape JA, Borgers M, Mercken M, Roth FC,  
637 Draguhn A, Slomianka L, Wolfer DP, Korte M, Muller UC (2015) Acute function of  
638 secreted amyloid precursor protein fragment APP $\alpha$  in synaptic plasticity. *Acta*  
639 *Neuropathol* **129**:21-37. <https://doi.org/10.1007/s00401-014-1368-x>
- 640 Ishida A, Furukawa K, Keller JN, Mattson MP (1997) Secreted form of beta-amyloid  
641 precursor protein shifts the frequency dependency for induction of LTD, and  
642 enhances LTP in hippocampal slices. *Neuroreport* **8**:2133-2137.  
643 <https://doi.org/10.1097/00001756-199707070-00009>
- 644 Ivankova K, Turecek R, Fritzius T, Seddik R, Prezeau L, Comps-Agrar L, Pin JP, Fakler B,  
645 Besseyrias V, Gassmann M, Bettler B (2013) Up-regulation of GABA<sub>B</sub> receptor  
646 signaling by constitutive assembly with the K<sup>+</sup> channel tetramerization domain-  
647 containing protein 12 (KCTD12). *J Biol Chem* **288**:24848-24856.  
648 <https://doi.org/10.1074/jbc.M113.476770>
- 649 Kaupmann K, Malitschek B, Schuler V, Heid J, Froestl W, Beck P, Mosbacher J, Bischoff S,  
650 Kulik A, Shigemoto R, Karschin A, Bettler B (1998) GABA<sub>B</sub>-receptor subtypes  
651 assemble into functional heteromeric complexes. *Nature* **396**:683-687.  
652 <https://doi.org/10.1038/25360>
- 653 Korte M (2019) Neuronal function of Alzheimer's protein. *Science* **363**:123-124.  
654 <https://doi.org/10.1126/science.aaw0636>

Rem et al. Running title: Amyloid- $\beta$  is not a functional GABA<sub>B</sub> ligand

- 655 Lecat-Guillet N, Monnier C, Rovira X, Kniazeff J, Lamarque L, Zwier JM, Trinquet E, Pin JP,  
656 Rondard P (2017) FRET-based sensors unravel activation and allosteric modulation  
657 of the GABA<sub>B</sub> receptor. *Cell Chem Biol* **24**:360-370.  
658 <https://doi.org/10.1016/j.chembiol.2017.02.011>
- 659 Luscher C, Slesinger PA (2010) Emerging roles for G protein-gated inwardly rectifying  
660 potassium (GIRK) channels in health and disease. *Nat Rev Neurosci* **11**:301-315.  
661 <https://doi.org/10.1038/nrn2834>
- 662 Madisen L et al. (2015) Transgenic mice for intersectional targeting of neural sensors and  
663 effectors with high specificity and performance. *Neuron* **85**:942-958.  
664 <https://doi.org/10.1016/j.neuron.2015.02.022>
- 665 Magnuson ME, Thompson GJ, Pan WJ, Keilholz SD (2014) Time-dependent effects of  
666 isoflurane and dexmedetomidine on functional connectivity, spectral characteristics,  
667 and spatial distribution of spontaneous BOLD fluctuations. *Nmr Biomed* **27**:291-303.  
668 <https://doi.org/10.1002/nbm.3062>
- 669 Mao C, Shen C, Li C, Shen DD, Xu C, Zhang S, Zhou R, Shen Q, Chen LN, Jiang Z, Liu J,  
670 Zhang Y (2020) Cryo-EM structures of inactive and active GABA<sub>B</sub> receptor. *Cell Res*  
671 **30**:564-573. <https://doi.org/10.1038/s41422-020-0350-5>
- 672 Muller UC, Deller T, Korte M (2017) Not just amyloid: physiological functions of the amyloid  
673 precursor protein family. *Nat Rev Neurosci* **18**:281-298.  
674 <https://doi.org/10.1038/nrn.2017.29>
- 675 Olpe HR, Karlsson G, Pozza MF, Brugger F, Steinmann M, Van Riezen H, Fagg G, Hall RG,  
676 Froestl W, Bittiger H (1990) CGP 35348: a centrally active blocker of GABA<sub>B</sub>  
677 receptors. *Eur J Pharmacol* **187**:27-38. [https://doi.org/10.1016/0014-2999\(90\)90337-6](https://doi.org/10.1016/0014-2999(90)90337-6)
- 678 Pachitariu M, Stringer C, Dipoppa M, Schroder S, Rossi L, Dalgleish H, Carandini M, Harris  
679 KD (2017) Suite2p: beyond 10,000 neurons with standard two-photon microscopy.  
680 *bioRxiv*. <https://doi.org/https://doi.org/10.1186/1475-925X-2-13>.
- 681 Pagano A, Rovelli G, Mosbacher J, Lohmann T, Duthey B, Stauffer D, Ristig D, Schuler V,  
682 Meigel I, Lampert C, Stein T, Prezeau L, Blahos J, Pin J, Froestl W, Kuhn R, Heid J,

Rem et al. Running title: Amyloid- $\beta$  is not a functional GABA<sub>B</sub> ligand

- 683 Kaupmann K, Bettler B (2001) C-terminal interaction is essential for surface trafficking  
684 but not for heteromeric assembly of GABA<sub>B</sub> receptors. *J Neurosci* **21**:1189-1202.
- 685 Papasergi-Scott MM, Robertson MJ, Seven AB, Panova O, Mathiesen JM, Skiniotis G (2020)  
686 Structures of metabotropic GABA<sub>B</sub> receptor. *Nature* **584**:310-314.  
687 <https://doi.org/10.1038/s41586-020-2469-4>
- 688 Park J et al. (2020) Structure of human GABA<sub>B</sub> receptor in an inactive state. *Nature* **584**:304-  
689 309. <https://doi.org/10.1038/s41586-020-2452-0>
- 690 Pin JP, Bettler B (2016) Organization and functions of mGlu and GABA<sub>B</sub> receptor complexes.  
691 *Nature* **540**:60-68. <https://doi.org/10.1038/nature20566>
- 692 Pologruto TA, Sabatini BL, Svoboda K (2003) ScanImage: Flexible software for operating  
693 laser scanning microscopes. *Biomed Eng Online* **2**. <https://doi.org/Doi> 10.1186/1475-  
694 925x-2-13
- 695 Rajalu M, Fritzius T, Adelfinger L, Jacquier V, Besseyrias V, Gassmann M, Bettler B (2015)  
696 Pharmacological characterization of GABA<sub>B</sub> receptor subtypes assembled with  
697 auxiliary KCTD subunits. *Neuropharmacology* **88**:145-154.  
698 <https://doi.org/10.1016/j.neuropharm.2014.08.020>
- 699 Rice HC, de Malmazet D, Schreurs A, Frere S, Van Molle I, Volkov AN, Creemers E, Vertkin  
700 I, Nys J, Ranaivoson FM, Comoletti D, Savas JN, Remaut H, Balschun D, Wierda KD,  
701 Slutsky I, Farrow K, De Strooper B, de Wit J (2019) Secreted amyloid- $\beta$  precursor  
702 protein functions as a GABA<sub>B</sub>R1a ligand to modulate synaptic transmission. *Science*  
703 **363**. <https://doi.org/10.1126/science.aao4827>
- 704 Richter MC, Ludewig S, Winschel A, Abel T, Bold C, Salzburger LR, Klein S, Han K, Weyer  
705 SW, Fritz AK, Laube B, Wolfer DP, Buchholz CJ, Korte M, Muller UC (2018) Distinct  
706 in vivo roles of secreted APP ectodomain variants APP $\alpha$  and APP $\beta$  in  
707 regulation of spine density, synaptic plasticity, and cognition. *EMBO J* **37**.  
708 <https://doi.org/10.15252/emj.201798335>

Rem et al. Running title: Amyloid- $\beta$  is not a functional GABA<sub>B</sub> ligand

- 709 Schuler V et al. (2001) Epilepsy, hyperalgesia, impaired memory, and loss of pre- and  
710 postsynaptic GABA<sub>B</sub> responses in mice lacking GABA<sub>B1</sub>. *Neuron* **31**:47-58.  
711 [https://doi.org/10.1016/s0896-6273\(01\)00345-2](https://doi.org/10.1016/s0896-6273(01)00345-2)
- 712 Schwenk J, Perez-Garci E, Schneider A, Kollwe A, Gauthier-Kemper A, Fritzius T, Raveh A,  
713 Dinamarca MC, Hanuschkin A, Bildl W, Klingauf J, Gassmann M, Schulte U, Bettler  
714 B, Fakler B (2016) Modular composition and dynamics of native GABA<sub>B</sub> receptors  
715 identified by high-resolution proteomics. *Nat Neurosci* **19**:233-242.  
716 <https://doi.org/10.1038/nn.4198>
- 717 Seabrook GR, Smith DW, Bowery BJ, Easter A, Reynolds T, Fitzjohn SM, Morton RA, Zheng  
718 H, Dawson GR, Sirinathsinghji DJ, Davies CH, Collingridge GL, Hill RG (1999)  
719 Mechanisms contributing to the deficits in hippocampal synaptic plasticity in mice  
720 lacking amyloid precursor protein. *Neuropharmacology* **38**:349-359.  
721 [https://doi.org/10.1016/s0028-3908\(98\)00204-4](https://doi.org/10.1016/s0028-3908(98)00204-4)
- 722 Shaye H, Stauch B, Gati C, Cherezov V (2021) Molecular mechanisms of metabotropic  
723 GABAB receptor function. *Sci Adv* **7**. <https://doi.org/10.1126/sciadv.abg3362>
- 724 Shaye H, Ishchenko A, Lam JH, Han GW, Xue L, Rondard P, Pin JP, Katritch V, Gati C,  
725 Cherezov V (2020) Structural basis of the activation of a metabotropic GABA  
726 receptor. *Nature* **584**:298-303. <https://doi.org/10.1038/s41586-020-2408-4>
- 727 Shen C, Mao C, Xu C, Jin N, Zhang H, Shen DD, Shen Q, Wang X, Hou T, Chen Z, Rondard  
728 P, Pin JP, Zhang Y, Liu J (2021) Structural basis of GABA<sub>B</sub> receptor-Gi protein  
729 coupling. *Nature*. <https://doi.org/10.1038/s41586-021-03507-1>
- 730 Sorensen J, Wiklendt L, Hibberd T, Costa M, Spencer NJ (2017) Techniques to identify and  
731 temporally correlate calcium transients between multiple regions of interest in  
732 vertebrate neural circuits. *J Neurophysiol* **117**:885-902.  
733 <https://doi.org/10.1152/jn.00648.2016>
- 734 Stefan E, Aquin S, Berger N, Landry CR, Nyfeler B, Bouvier M, Michnick SW (2007)  
735 Quantification of dynamic protein complexes using Renilla luciferase fragment

Rem et al. Running title: Amyloid- $\beta$  is not a functional GABA<sub>B</sub> ligand

736 complementation applied to protein kinase A activities in vivo. *Proc Natl Acad Sci U S*  
737 *A* **104**:16916-16921. <https://doi.org/10.1073/pnas.0704257104>

738 Tang BL (2019) Amyloid precursor protein (APP) and GABAergic neurotransmission. *Cells* **8**.  
739 <https://doi.org/10.3390/cells8060550>

740 Taylor CJ, Ireland DR, Ballagh I, Bourne K, Marechal NM, Turner PR, Bilkey DK, Tate WP,  
741 Abraham WC (2008) Endogenous secreted amyloid precursor protein-alpha regulates  
742 hippocampal NMDA receptor function, long-term potentiation and spatial memory.  
743 *Neurobiol Dis* **31**:250-260. <https://doi.org/10.1016/j.nbd.2008.04.011>

744 Turecek R, Schwenk J, Fritzius T, Ivankova K, Zolles G, Adelfinger L, Jacquier V, Besseyrias  
745 V, Gassmann M, Schulte U, Fakler B, Bettler B (2014) Auxiliary GABA<sub>B</sub> receptor  
746 subunits uncouple G protein  $\beta\gamma$  subunits from effector channels to induce  
747 desensitization. *Neuron* **82**:1032-1044. <https://doi.org/10.1016/j.neuron.2014.04.015>

748 Vigot R, Barbieri S, Brauner-Osborne H, Turecek R, Shigemoto R, Zhang YP, Lujan R,  
749 Jacobson LH, Biermann B, Fritschy JM, Vacher CM, Muller M, Sansig G, Guetg N,  
750 Cryan JF, Kaupmann K, Gassmann M, Oertner TG, Bettler B (2006) Differential  
751 compartmentalization and distinct functions of GABA<sub>B</sub> receptor variants. *Neuron*  
752 **50**:589-601. <https://doi.org/10.1016/j.neuron.2006.04.014>

753 Wischmeyer E, Doring F, Wischmeyer E, Spauschus A, Thomzig A, Veh R, Karschin A  
754 (1997) Subunit interactions in the assembly of neuronal Kir3.0 inwardly rectifying K<sup>+</sup>  
755 channels. *Mol Cell Neurosci* **9**:194-206. <https://doi.org/10.1006/mcne.1997.0614>

756 Yang HJ, Mei JF, Xu W, Ma XH, Sun B, Ai HQ (2022) Identification of the probable structure  
757 of the sAPP alpha-GABA<sub>B</sub>R1a complex and theoretical solutions for such cases. *Phys*  
758 *Chem Chem Phys*. <https://doi.org/10.1039/d2cp00569g>

759 Yates D (2019) Revealing a receptor for secreted APP. *Nat Rev Neurosci* **20**:129.  
760 <https://doi.org/10.1038/s41583-019-0136-2>

761 Yoo Y et al. (2017) *GABBR2* mutations determine phenotype in rett syndrome and epileptic  
762 encephalopathy. *Ann Neurol* **82**:466-478. <https://doi.org/10.1002/ana.25032>

763

764 **Figure legends**

765 **Figure 1. Characterization of synthetic APP17 and sc-APP17 peptides.** (A) Sequence  
766 alignment of APP17, sc-APP17, APP17-TMR and sc-APP17-TMR peptides. Residues critical  
767 for SD1 binding are shown in red. (B) Representative ITC diagrams of the titrations of SD1/2  
768 protein in solution (30  $\mu$ M) with APP17 (blue) or sc-APP17 (magenta) (300  $\mu$ M in the  
769 syringe); raw heat signature (top) and integrated molar heat release (bottom). The calculated  
770 stoichiometry of APP17:SD1/2 protein is 1.05, the  $K_D$  543 nM. sc-APP17 showed no binding  
771 to SD1/2 protein. (C) Bar graph showing APP17-TMR (1  $\mu$ M) binding to GB1a/2 receptors in  
772 HEK293T cells in the presence of vehicle (black), 10  $\mu$ M APP17 (blue), and 10  $\mu$ M sc-APP17  
773 (magenta). sc-APP17-TMR (1  $\mu$ M) served as a negative control. The background  
774 fluorescence of sc-APP17-TMR (1  $\mu$ M) at HEK293T cells transfected with empty vector was  
775 subtracted. Data are means  $\pm$  SEM. The number of independent experiments is indicated. ns  
776 = not significant, \* $p < 0.05$ , \*\* $p < 0.01$ , one-way ANOVA with Holm-Sidak's multiple  
777 comparisons test. Source file containing ICT and TMR fluorescence data is available in  
778 Figure 1 – source data 1.

779

780 **Figure 2. APP17 does not induce the active state of GB1a/2 receptors.** (A) Assay  
781 measuring intersubunit FRET between fluorophore labelled ACP and SNAP tags in the GB1a  
782 and GB2 subunits, respectively. In the absence of receptor agonists, the ACP and SNAP  
783 tags are in close proximity resulting in high FRET. Activation of GB1a/2 receptors induces a  
784 conformational change in the extracellular domains leading to a reduction in FRET. (B)  
785 GABA dose-response curves in the presence of APP17 (blue) or sc-APP17 (magenta) at 1  
786  $\mu$ M (triangles) and 10  $\mu$ M (squares) or vehicle (black) exhibit significant differences. (C) Bar  
787 graphs showing FRET in the presence of 1  $\mu$ M or 10  $\mu$ M APP17 (blue) and sc-APP17  
788 (magenta) or vehicle (black). Under basal conditions (circles), the presence of 10  $\mu$ M APP17  
789 resulted in a significant increase of FRET, whereas no significant changes in FRET were  
790 observed for all other conditions when compared to vehicle. In the presence of 10 mM GABA  
791 (diamonds) no significant differences in FRET were detected with APP17 or sc-APP17 at 1



Rem et al. Running title: Amyloid- $\beta$  is not a functional GABA<sub>B</sub> ligand

792  $\mu$ M or 10  $\mu$ M compared to vehicle. In all conditions, the presence of 10 mM GABA induced a  
793 significant reduction in FRET compared to basal. **(D)** LogEC<sub>50</sub> values of individual GABA  
794 dose-response curves exhibit no significant differences between conditions. Data are means  
795  $\pm$  SEM. Three outliers were identified in **c** using the ROUT method (PRISM) with Q = 1%  
796 (source file). The number of independent experiments is indicated. \*\*p < 0.01, \*\*\*p < 0.001,  
797 \*\*\*\*p < 0.0001, two-way ANOVA with Sidak's multiple comparisons test. Source file  
798 containing FRET data is available in Figure 2 – source data 1.

799

800 **Figure 3. APP17 is not an agonist, inverse agonist, antagonist or allosteric modulator**  
801 **at GB1a/2 receptors expressed in HEK293T cells in a BRET assay monitoring G**  
802 **protein activation. (A) Left** Assay measuring BRET between G $\alpha_o$ -RLuc and Venus-G $\gamma_2$ .  
803 GB1a/2 receptor activation leads to dissociation of the heterotrimeric G protein and a  
804 consequent decrease in BRET. *Right* Individual experiments showing GABA-induced BRET  
805 changes at GB1a/2 receptors. The inverse agonist CGP54626 reverses GABA-induced  
806 BRET changes above baseline, indicating constitutive GB1a/2 receptor activity. Likewise,  
807 direct application of CGP54626 increased BRET levels above baseline. Subsequent  
808 application of GABA did not overcome receptor inhibition. Bar graphs summarize  
809 CGP54626-induced BRET changes. Note that application of CGP54626 resulted in similar  
810 inhibition of constitutive GB1a/2 receptor activity in the absence (black) or presence (green)  
811 of APP695 *in cis*. **(B)** Neither APP17 (blue) nor sc-APP17 (magenta) at 1  $\mu$ M (left) or 10  $\mu$ M  
812 (right) altered BRET in cells expressing GB1a/2 receptors. In the same cells, GABA at 1  $\mu$ M  
813 (left) and 10  $\mu$ M (right) induced the expected decrease in BRET. The GABA-induced BRET  
814 change is similar in the presence of APP17 and scAPP17, indicating the absence of  
815 allosteric properties of the peptides at GB1a/2 receptors. Bar graphs summarize BRET  
816 changes determined in experiments as shown to the left. **(C,D)** Neither APP17 (blue) nor sc-  
817 APP17 (magenta) at 1  $\mu$ M (left) or 10  $\mu$ M (right) altered BRET in cells expressing GB1a/2  
818 receptors together with APP695 *in cis* (C) or *in trans* (D). Bar graphs summarize BRET  
819 changes. Data are means  $\pm$  SEM. The number of independent experiments is indicated in

Rem et al. Running title: Amyloid- $\beta$  is not a functional GABA<sub>B</sub> ligand

820 the bar graphs. ns = not significant, Two-way ANOVA with Sidak's multiple comparisons test.  
821 \*\*p < 0.01, One sample Wilcoxon test (non-parametric) against 0. Source file containing  
822 BRET data is available in Figure 3 – source data 1.

823

824 **Figure 4. APP17 is not an agonist, inverse agonist, antagonist or allosteric modulator**  
825 **at GB1a/2 receptors expressed in HEK293T cells in an assay monitoring G $\alpha_i$  signaling.**

826 **(A)** *Left* Assay monitoring dissociation of the regulatory (R) and catalytic (C) subunits of the  
827 tetrameric PKA holoenzyme upon cAMP binding. PKA subunits were tagged with N- or C-  
828 terminal fragments of RLuc (R-RLuc-N, C-RLuc-C). GB1a/2 receptor activation by GABA  
829 reduces intracellular cAMP levels, promotes reconstitution of RLuc activity and increases  
830 luminescence. *Right* Individual experiments showing GABA-induced luminescence changes.  
831 Blockade of GB1a/2 receptor activity with CGP54626 decreased luminescence below  
832 baseline, indicating constitutive GB1a/2 receptor activity. Subsequent application of GABA  
833 did not overcome receptor inhibition. **(B)** Neither APP17 (blue) nor sc-APP17 (magenta)  
834 altered luminescence in HEK293T cells expressing GB1a/2 receptors. In the same cells,  
835 GABA induced the expected luminescence increases. GABA-induced luminescence changes  
836 are similar in the presence of APP17 and sc-APP17. Bar graphs summarize the  
837 luminescence changes. **(C)** Neither APP17 (blue) nor sc-APP17 (magenta) induced  
838 luminescence changes in HEK293T cells expressing GB1a/2 receptors together with  
839 APP695 *in cis*. Application of GABA to the same cells resulted in the expected luminescence  
840 increases. GABA-induced luminescence changes are similar in the presence of APP17 or sc-  
841 APP17. Bar graphs summarize the luminescence changes. Data are means  $\pm$  SEM. The  
842 number of independent experiments is indicated. ns = not significant, Two-way ANOVA with  
843 Sidak's multiple comparison test. \*\*p < 0.01, \*\*\*p < 0.001; \*\*\*\*p < 0.0001, One sample t-test  
844 against 0. Source file containing PKA luminescence data is available in Figure 4 – source  
845 data 1.

846

847 **Figure 5. APP17 is not an agonist, inverse agonist, allosteric modulator or antagonist**  
848 **at GB1a/2 receptors expressed in HEK293T cells when monitoring Ga<sub>qi</sub> signaling in an**  
849 **accumulation assay. (A) Left** Assay monitoring PLC dependent FLuc expression under  
850 control of the serum response element (SRE). GB1a/2 receptors were artificially coupled to  
851 PLC by stably expressing the chimeric G protein subunit Ga<sub>qi</sub>. GB1a/2 receptors and SRE-  
852 FLuc reporter were transiently expressed in HEK293T-Ga<sub>qi</sub> cells. *Right* Dose-response curve  
853 showing that GABA (black) but not APP17 (blue) or sc-APP17 (magenta) induces FLuc  
854 activity in transfected cells. **(B)** CGP54626 blocked constitutive and GABA-induced FLuc  
855 activity in transfected cells. Constitutive GB1a/2 receptor activity is unchanged in the  
856 presence of APP17 (middle) or sc-APP17 (right) at 1 or 10  $\mu$ M, indicating the absence of  
857 inverse agonistic properties of the peptides at GB1a/2 receptors. **(C,D)** APP17 (blue) or sc-  
858 APP17 (magenta) at 1  $\mu$ M (triangles) or 10  $\mu$ M (squares) did not significantly alter GABA  
859 dose-response curves in the absence (C) or presence (D) of APP695 *in cis*, indicating that  
860 the peptides do not allosterically regulate GB1a/2 receptors. Tables show basal, EC<sub>50</sub> and  
861 Emax values derived from the curve fits. All data are mean  $\pm$  SD. The number of independent  
862 experiments is indicated in the bar graphs or tables. Linear regression curve fit of 6 (APP17,  
863 sc-APP17, A) independent experiments per condition. Non-linear regression curve fits of 6  
864 (GABA, A) or 11 (C,D) independent experiments per condition.  $p = 0.58$ ,  $p = 0.27$ , extra sum-  
865 of-squares F test. Source file containing FLuc activity data is available in Figure 5 – source  
866 data 1.

867

868 **Figure 6. APP17 is not an agonist, antagonist or allosteric modulator at native GB1a/2**  
869 **receptors in [<sup>35</sup>S]GTP $\gamma$ S binding experiments.** [<sup>35</sup>S]GTP $\gamma$ S binding in membrane  
870 preparations of WT mice induced by increasing concentrations of GABA is not altered in the  
871 presence of APP17 (blue). The table shows basal, EC<sub>50</sub> and Emax values derived from non-  
872 linear regression curve fits. Experiments with vehicle and APP17 were performed with  
873 membrane preparations from the same mouse. Data are mean  $\pm$  SEM. Non-linear regression  
874 curve fit of 9 (vehicle) and 8 (APP17) independent experiments with 9 different mice.  $p =$

Rem et al. Running title: Amyloid- $\beta$  is not a functional GABA<sub>B</sub> ligand

875 0.91, extra sum-of-squares F test. Source file containing [<sup>35</sup>S]GTP $\gamma$ S data is available in  
876 Figure 6 – source data 1.

877

878 **Figure 7. APP17 does not evoke or influence GB1a/2 receptor-mediated K<sup>+</sup> currents in**  
879 **cultured hippocampal neurons. (A)** GBR activation with baclofen results in the dissociation  
880 of the heterotrimeric G protein and the subsequent activation of K<sup>+</sup> channels by G $\beta\gamma$ . **(B)**  
881 Representative traces showing that neither APP17 (top) nor sc-APP17 (bottom) evoke  
882 GB1a/2 receptor-induced K<sup>+</sup> currents in cultured hippocampal neurons. Application of  
883 baclofen alone or in the presence of APP17 or sc-APP17 yielded similar current amplitudes,  
884 showing that APP17 does not allosterically modulate baclofen-induced currents. **(C)** Bar  
885 graphs showing K<sup>+</sup> current densities determined in experiments as shown to the top. Data  
886 are means  $\pm$  SEM. The number of independent experiments is indicated in the bar graphs.  
887 ns = not significant, \*\*p < 0.01, \*\*\*p < 0.001 Paired one-way ANOVA with Holm-Sidak's  
888 multiple comparisons test (to compare different means) and One sample t-test against 0.  
889 Source file containing K<sup>+</sup> current data is available in Figure 7 – source data 1.

890

891 **Figure 8. APP17 does not influence the amplitude of evoked EPSCs recorded in CA1**  
892 **pyramidal neurons of acute hippocampal slices. (A)** Sample EPSCs at baseline and in  
893 the presence of APP17 and baclofen (bac). **(B)** Time course of EPSC amplitudes in a CA1  
894 pyramidal neuron APP17 and baclofen were bath applied as indicated. **(C)** Summary bar  
895 graph of the EPSC amplitude reduction in the presence of APP17 and baclofen. The number  
896 of recorded neurons from 6 different mice is indicated. ns = not significant; \*\*\*p<0.001, one  
897 sample t-test against 0; \*\*\*\*p<0.0001, unpaired t-test. Source file containing EPSC data is  
898 available in Figure 8 – source data 1.

899

900 **Figure 9. APP17 does not influence spontaneous neuronal activity in the auditory**  
901 **cortex of mice. (A) Left** Two-photon imaging of Ca<sup>2+</sup> transients in the auditory cortex of  
902 anesthetized mice during perfusion of ACSF, APP17, sc-APP17 and baclofen. *Right* Scheme

Rem et al. Running title: Amyloid- $\beta$  is not a functional GABA<sub>B</sub> ligand

903 of the experimental design. Time specifications denote the durations of the perfusions.  
904 Yellow lines indicate the two-photon Ca<sup>2+</sup> imaging periods (5 min each). **(B)** *In vivo* two-  
905 photon image of neurons expressing GCaMP6f. Representative neurons selected to illustrate  
906 Ca<sup>2+</sup> transients in **(C)** are marked with yellow circles. **(C)** Ca<sup>2+</sup> transients of neurons shown in  
907 **(B)** across the entire 5 min imaging period of a given condition. **(D)** Cumulative distribution of  
908 the frequency of Ca<sup>2+</sup> transients, comparing sc-APP17 with baseline (ACSF I) and washout  
909 (ACSF II) and perfusion with baclofen (bac). **(E)** Cumulative distribution of the frequency of  
910 Ca<sup>2+</sup> transients, comparing APP17 with baseline (ACSF II) and washout (ACSF III) and  
911 baclofen. (D,E) 95% confidence intervals are shown as shaded areas. The number of  
912 neurons recorded in each condition are indicated. Kruskal Wallis multicomparison test:  
913 APP17 vs ACSF I, II, III and sc-APP17 are not significantly different ( $p > 0.05$ ); bac vs ACSF  
914 I, II, III, sc-APP17 and APP17 are all significantly different ( $p < 0.0001$ ). For detailed p-  
915 values, see Figure 9 – figure supplement 1. Source file containing Ca<sup>2+</sup> transient data is  
916 available in Figure 9 – source data 1.  
917

Rem et al. Running title: Amyloid- $\beta$  is not a functional GABA<sub>B</sub> ligand

918 **Legends for figure supplements**

919 **Figure 5 – figure supplement 1. APP695 expressed *in cis* or *in trans* with GB1a/2**  
920 **receptors exerts no allosteric effects on G $\alpha_{qi}$  signaling in HEK293T cells.** GABA dose-  
921 response curves show no difference in the absence (black) or presence of APP695 (green)  
922 *in cis* (left) or *in trans* (right). Tables show basal, EC<sub>50</sub> and Emax values derived from the  
923 curve fits. All data are means  $\pm$  SD. The number of independent experiments is indicated in  
924 the tables. Non-linear regression curve fits of 11 independent experiments per condition. p =  
925 0.20, p = 0.96, extra sum-of-squares F test. Source file containing FLuc activity data is  
926 available in Figure 5 – source data 1.

927

928 **Figure 7 – figure supplement 1. APP17 does not evoke or influence GB1a/2 receptor-**  
929 **induced Kir3 currents in transfected HEK293T cells. (A,B) Left** Representative traces  
930 showing that neither APP17 (A) nor sc-APP17 (B) evoke GB1a/2 receptor-induced K<sup>+</sup>  
931 currents in transfected HEK293T cells. Application of GABA alone or in the presence of  
932 APP17 (A) or sc-APP17 (B) yielded similar current amplitudes, showing that the peptides do  
933 not allosterically modulate GABA-induced currents. *Right* Bar graphs showing K<sup>+</sup> current  
934 densities determined in experiments as shown to the left. Data are means  $\pm$  SEM. The  
935 number of independent experiments is indicated in the bar graphs. ns = not significant, \*p <  
936 0.05, \*\*p < 0.01, \*\*\*p < 0.001 Paired one-way ANOVA with Holm-Sidak's multiple  
937 comparisons test (to compare different means) and One sample t-test against 0. Source file  
938 containing K<sup>+</sup> current data is available in Figure 7 – source data 1.

939

940 **Figure 9 – figure supplement 1. Statistical analysis between perfusion conditions in**  
941 **two-photon Ca<sup>2+</sup> imaging experiments.** The significance between experimental conditions  
942 was tested with the Kruskal-Wallis multicomparison test as the data was not normally  
943 distributed. Note, only baclofen is significantly different (p < 0.0001) from all other  
944 experimental conditions.

**A**

| Peptide      | Sequence                                                   | MW   | Purity |
|--------------|------------------------------------------------------------|------|--------|
| APP17        | Ac-DDSDVWVGGA <sup>red</sup> DTDYADG-NH <sub>2</sub>       | 1886 | > 98 % |
| sc-APP17     | Ac-DWGADTVSGDGYDAWDD-NH <sub>2</sub>                       | 1886 | > 98 % |
| APP17-TMR    | TMR-PEG2-DDSDVWVGGA <sup>red</sup> DTDYADG-NH <sub>2</sub> | 2401 | > 95 % |
| sc-APP17-TMR | TMR-PEG2-DWGADTVSGDGYDAWDD-NH <sub>2</sub>                 | 2401 | > 95 % |

**B**

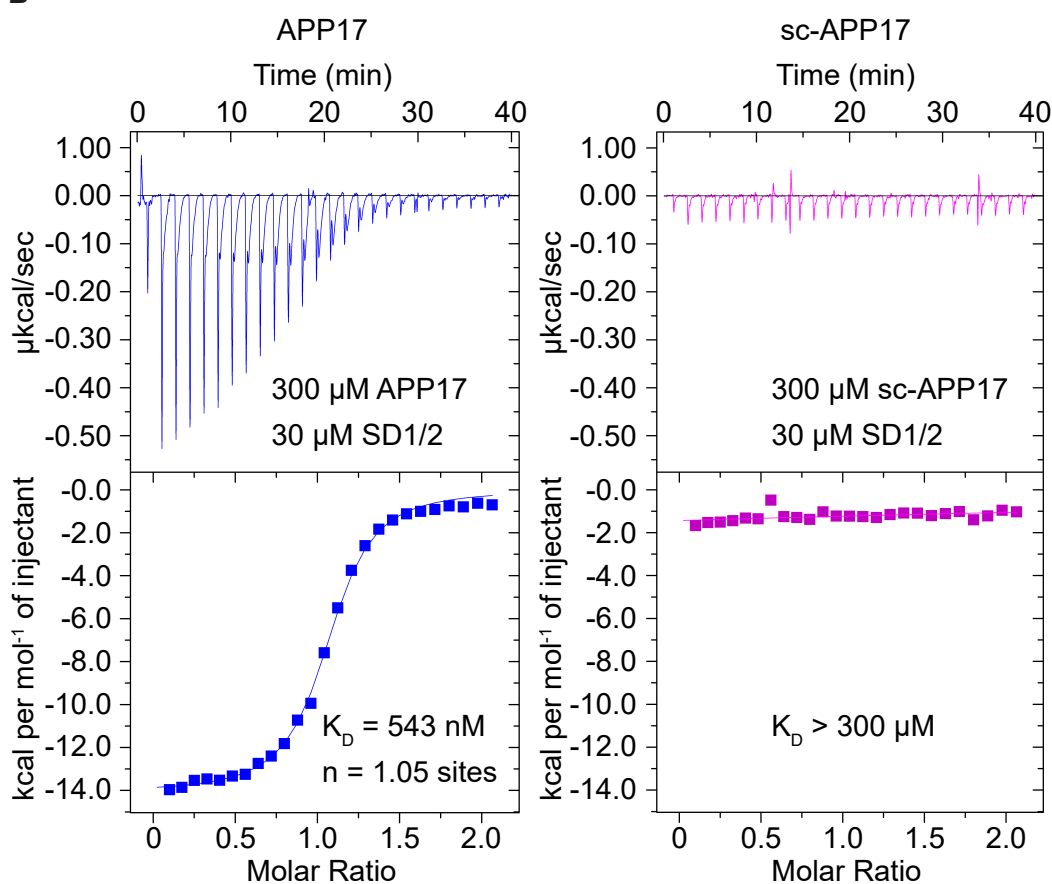

**C**

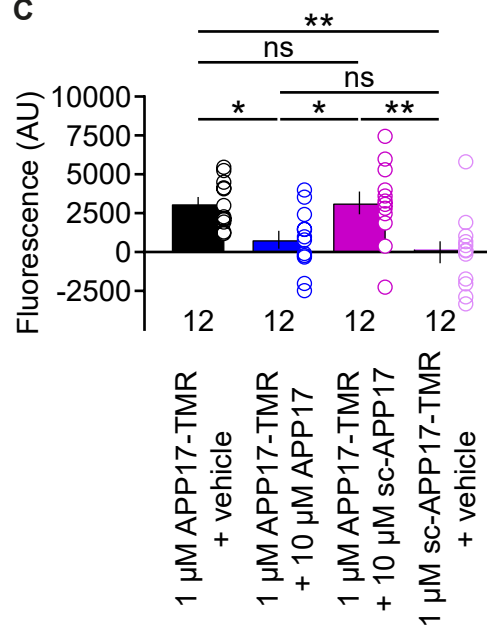

Rem et al. Figure 1



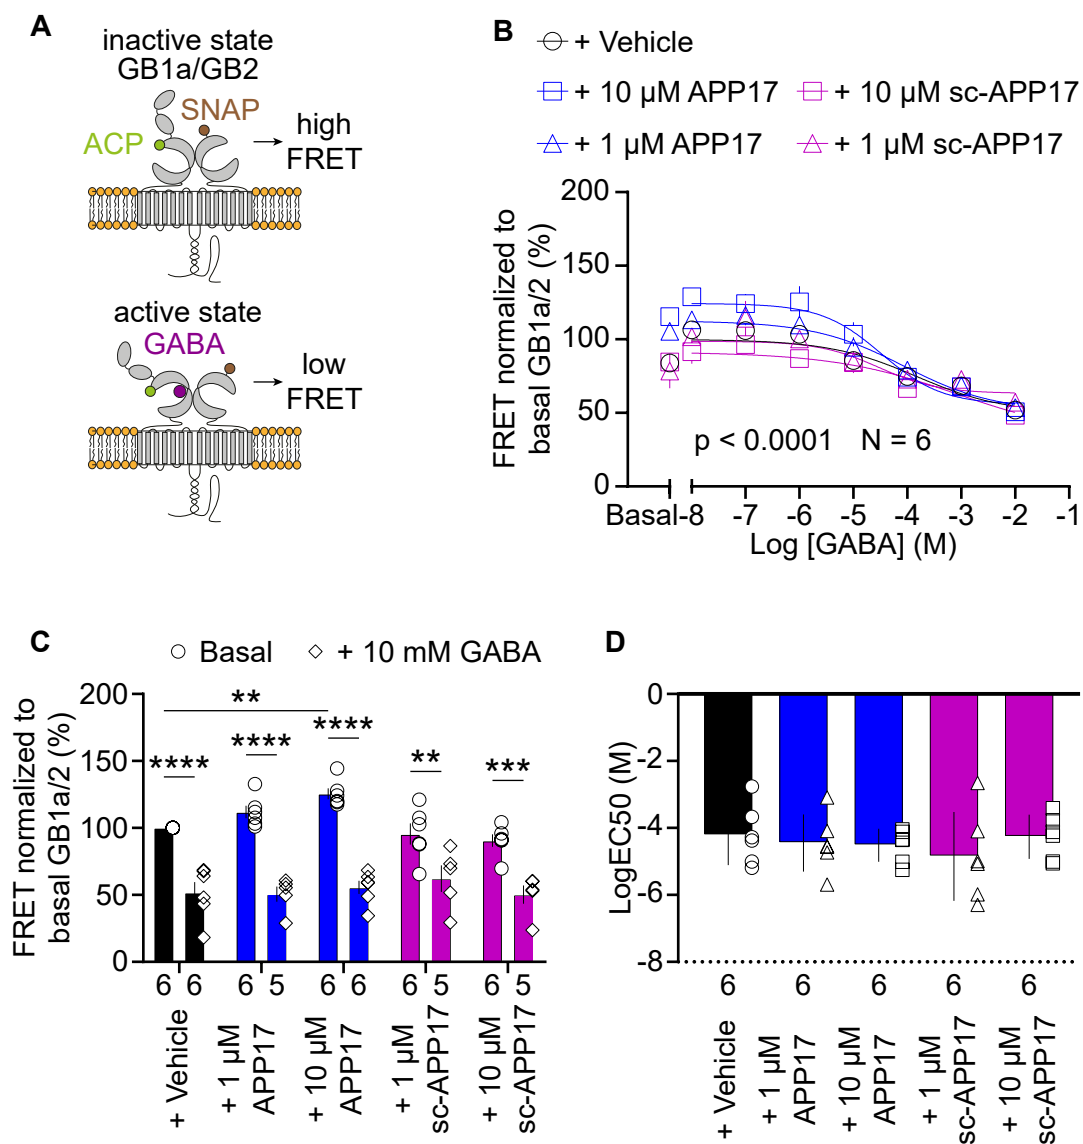

Rem et al. Figure 2

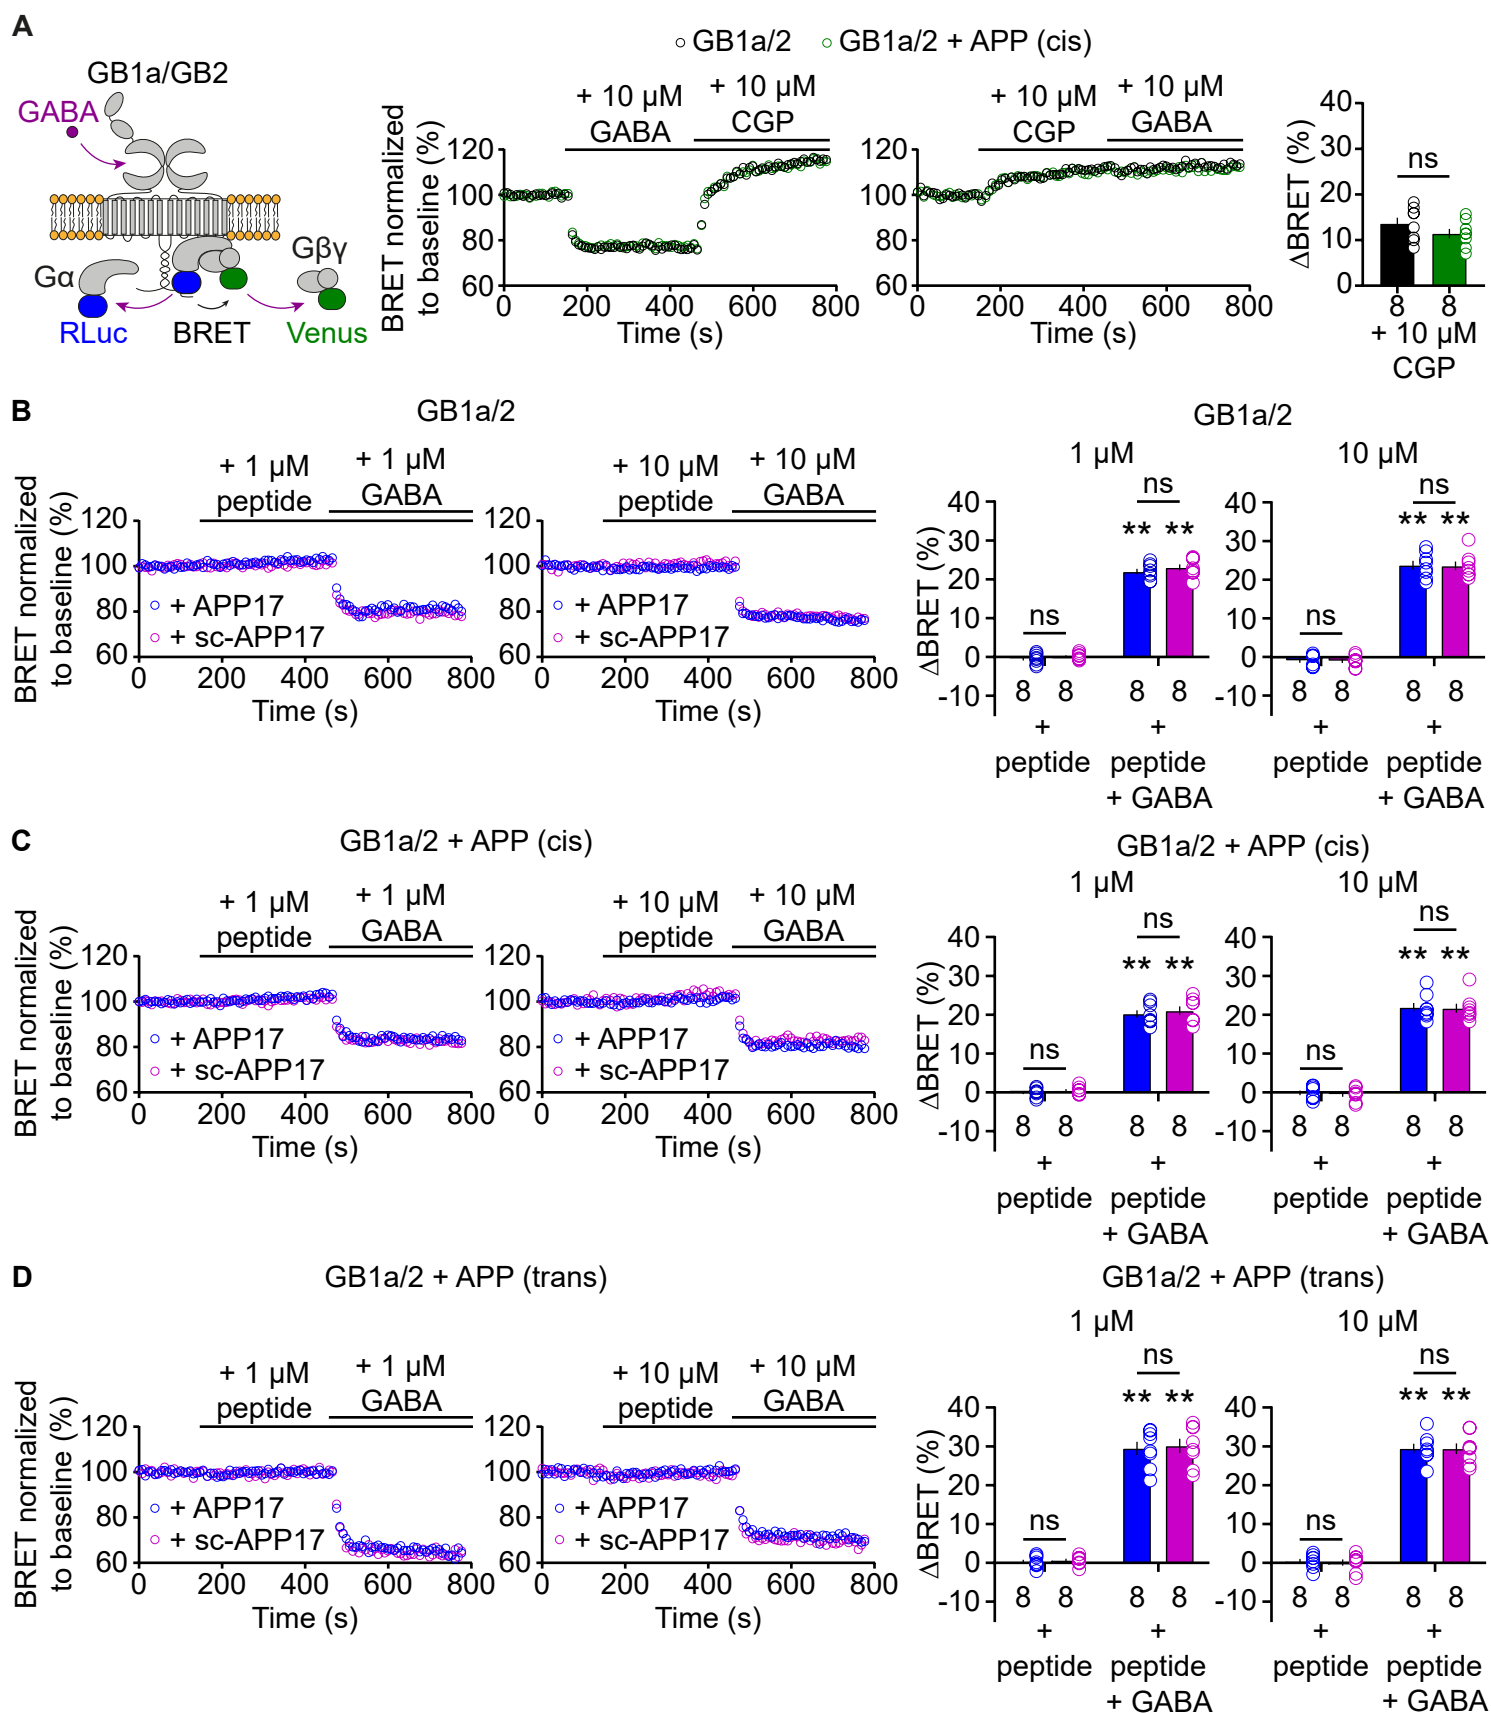

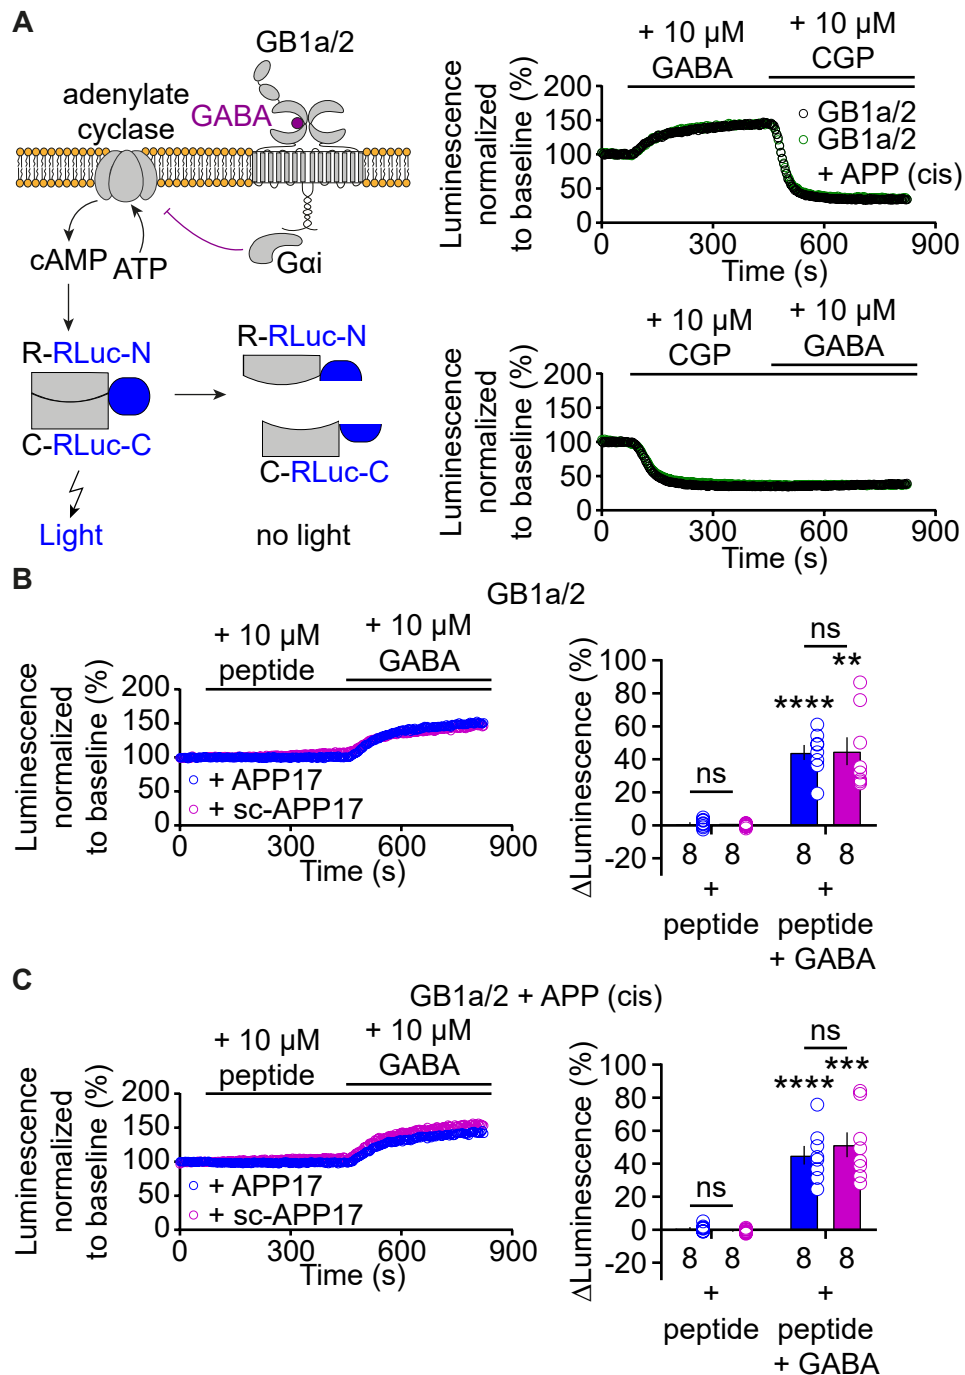

Rem et al. Figure 4

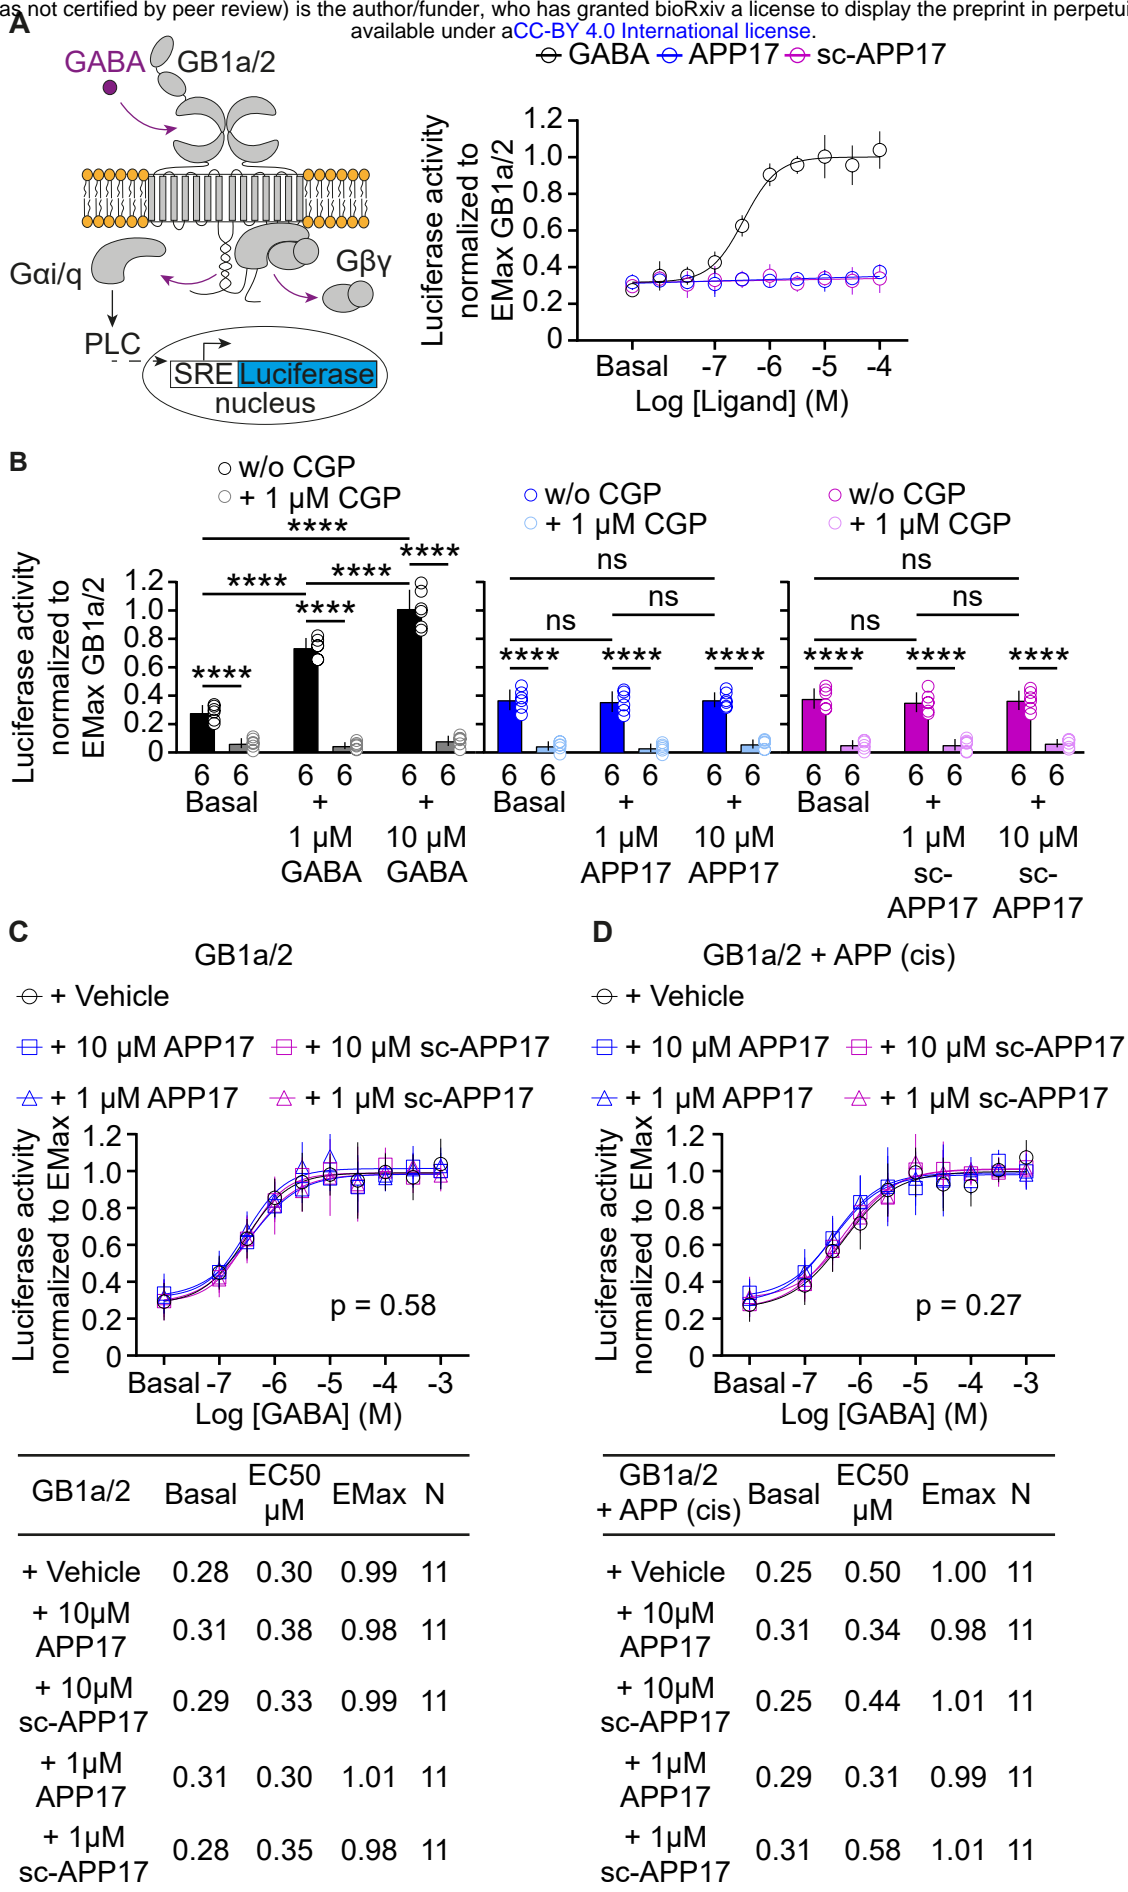

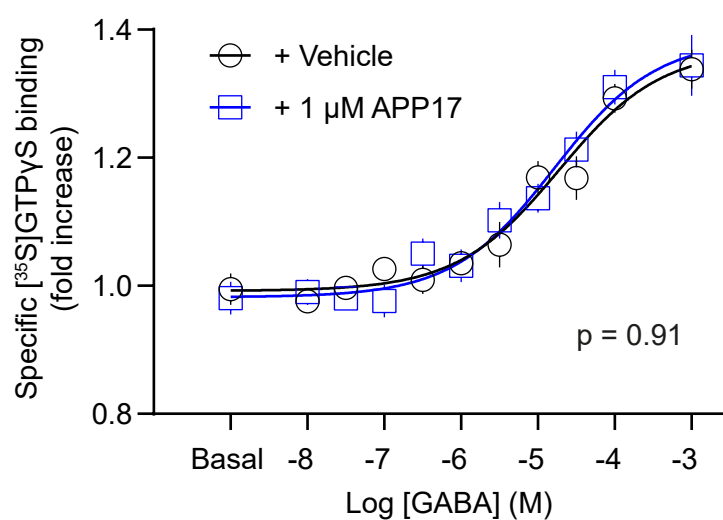

|                            | Basal | EC50<br>$\mu\text{M}$ | EMax | N |
|----------------------------|-------|-----------------------|------|---|
| + Vehicle                  | 0.99  | 18.82                 | 1.37 | 9 |
| + 1 $\mu\text{M}$<br>APP17 | 0.98  | 16.37                 | 1.39 | 8 |

Rem et al. Figure 6

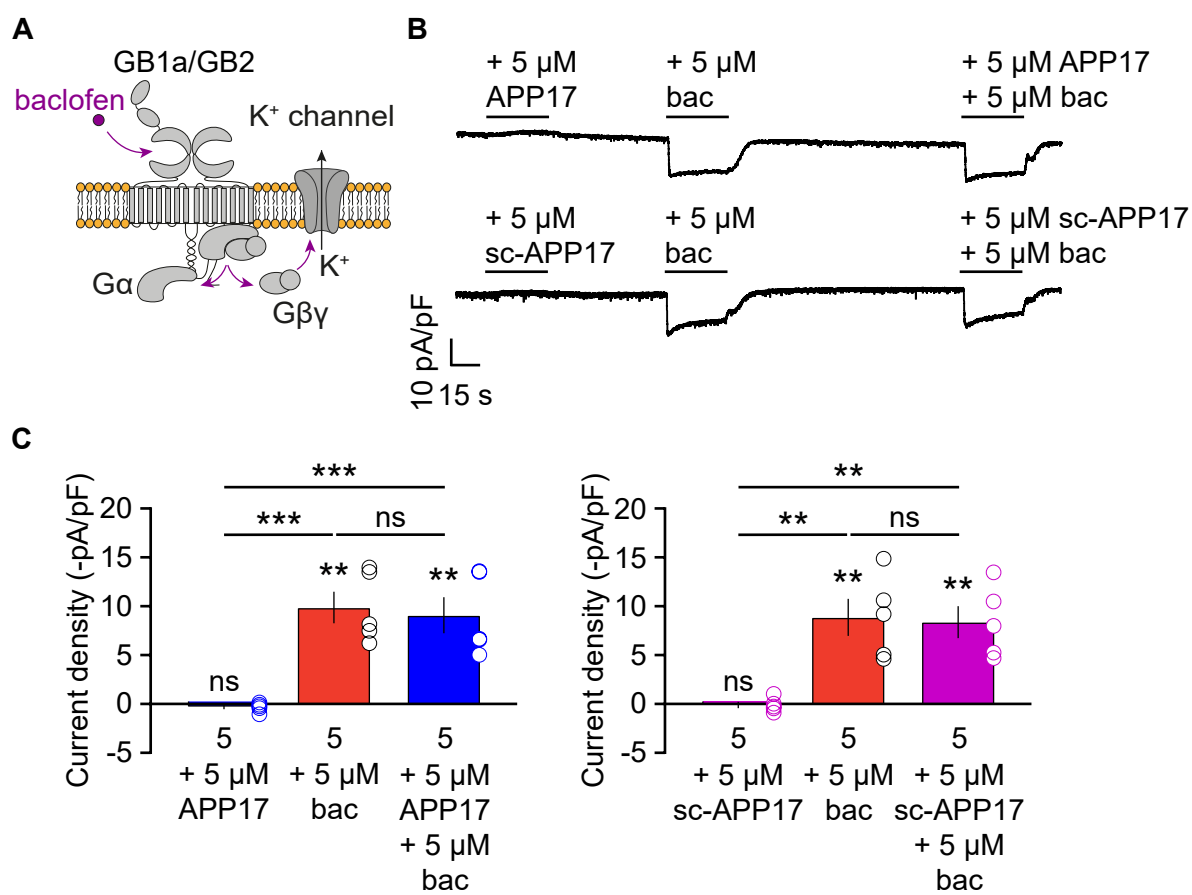

Rem et al. Figure 7

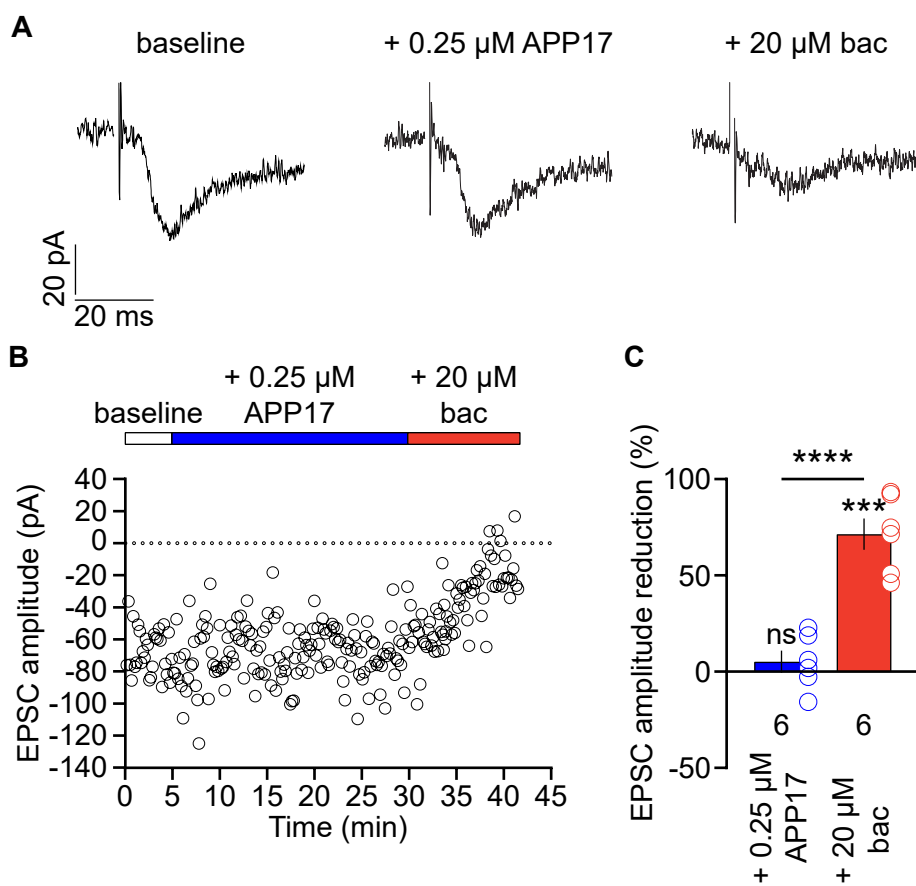

Rem et al. Figure 8



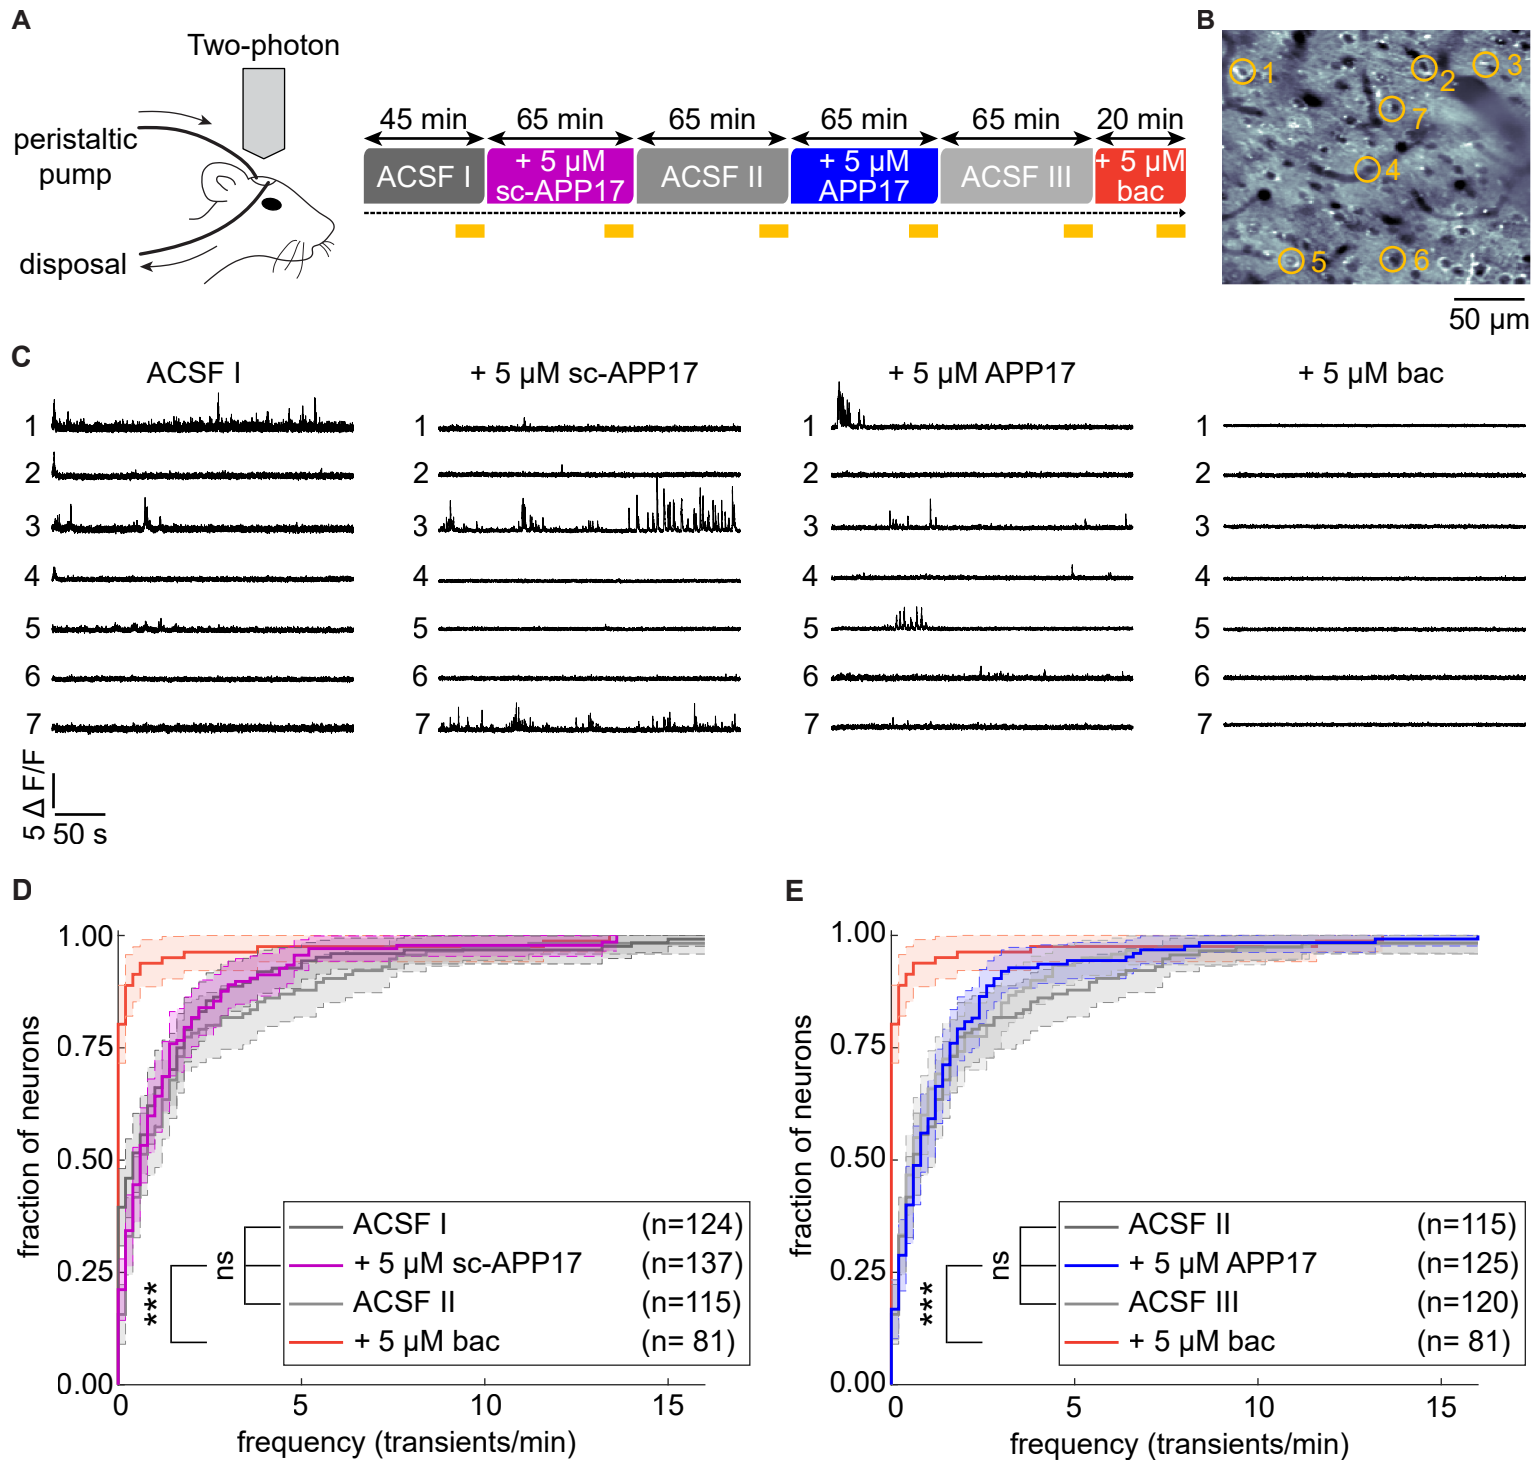

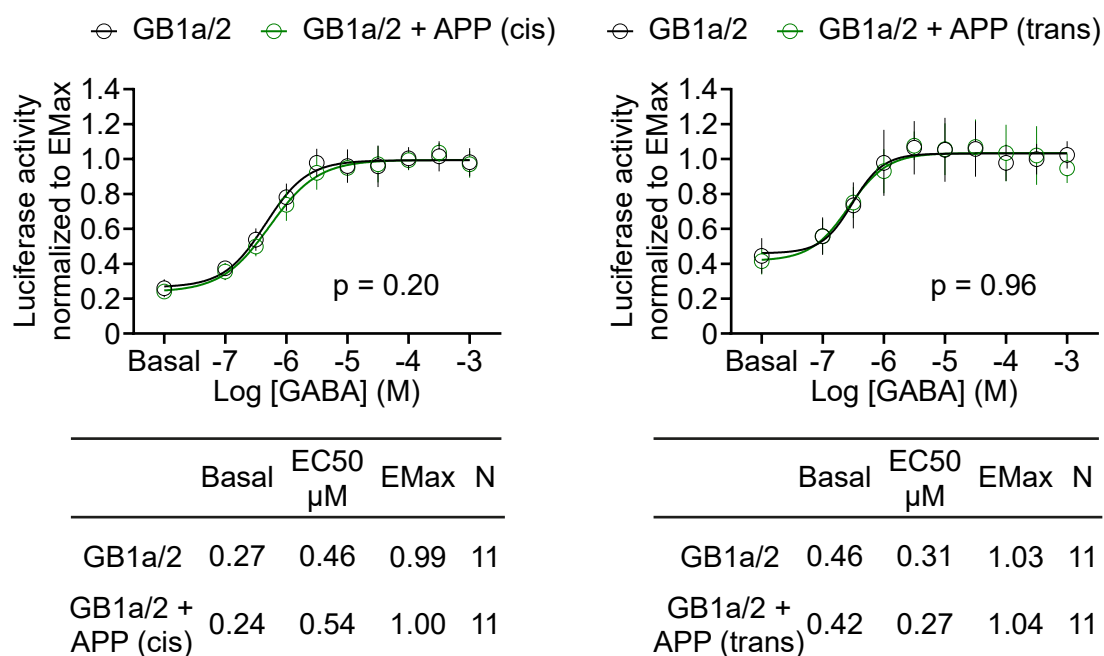

Rem et al. Figure 5 - figure supplement 1

**A**

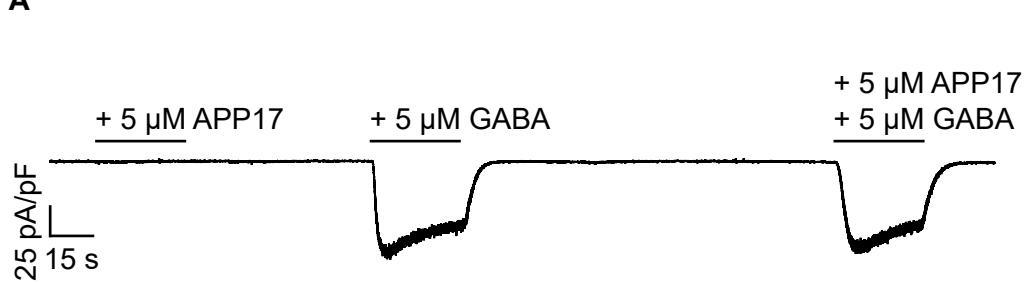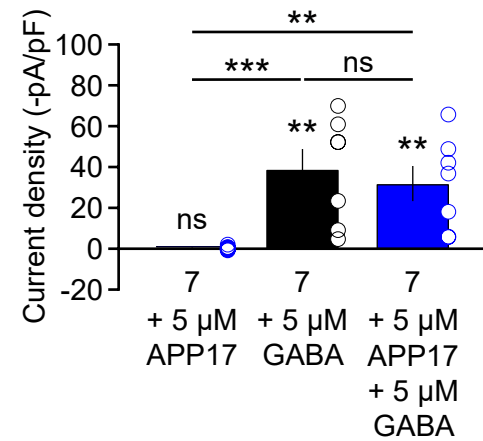

**B**

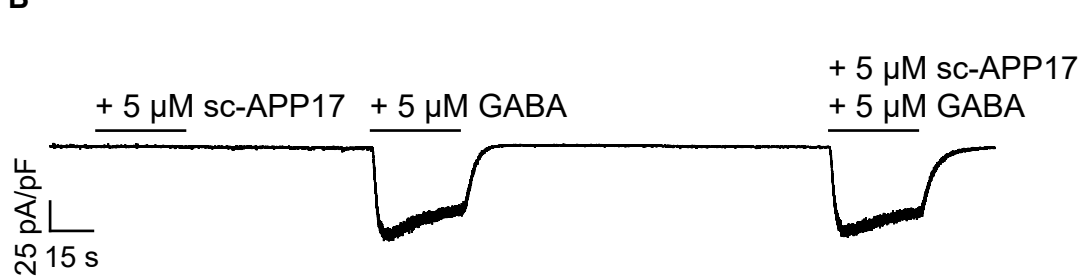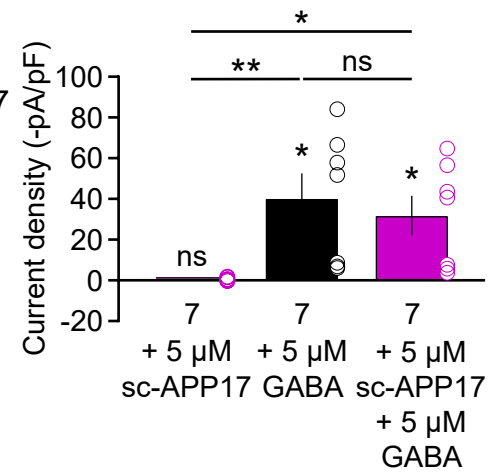

Rem et al. Figure 7 - figure supplement 1

| Perfusion condition | Perfusion condition | p-value |
|---------------------|---------------------|---------|
| ACSF I              | sc-APP17            | 0.6055  |
| ACSF I              | ACSF II             | 0.1222  |
| ACSF I              | APP17               | 0.1995  |
| ACSF I              | ACSF III            | 0.3625  |
| ACSF I              | baclofen            | 0.0000  |
| sc-APP17            | ACSF II             | 0.9156  |
| sc-APP17            | APP17               | 0.9756  |
| sc-APP17            | ACSF III            | 0.9980  |
| sc-APP17            | baclofen            | 0.0000  |
| ACSF II             | APP17               | 0.9998  |
| ACSF II             | ACSF III            | 0.9936  |
| ACSF II             | baclofen            | 0.0000  |
| APP17               | ACSF III            | 0.9997  |
| APP17               | baclofen            | 0.0000  |
| ACSF III            | baclofen            | 0.0000  |

Rem et al. Figure 9 - figure supplement 1
